# Supplementary material for: Unexpected relationships between frequency of antimicrobial resistance, disease phenotype and emm type in group A Streptococcus
Source: PubMed Central journal article supplement (PMC6927302; doi:10.1099/mgen.0.000316), 2019-11-22
Supplement: mgen-5-316-s001.pdf [file mgen-5-316-s001.pdf]

1 **SUPPORTING INFORMATION**

2

3 **SUPPORTING METHODS**

4

5 *Genome assembly, polymorphism discovery, and bioinformatics.* Long-read sequences  
6 were assembled using Canu v 1.7.1 (1) and resultant contiguous sequences (contigs)  
7 were imputed in the hybrid assembler Unicycler v 0.4.6 (2) that yielded a single  
8 complete chromosome for all strains. Complete genome sequences were submitted to  
9 the National Center for Biotechnology Information (NCBI) and annotated using NCBI's  
10 prokaryotic genome annotation pipeline (PGAP).

11 A custom in-house pipeline was used to identify polymorphisms (single  
12 nucleotide and insertions/deletions) relative to the *emm* type-matched reference  
13 including short-read sequences obtained from the sequence read archive (SRA) (3, 4).  
14 Short-read sequences were trimmed using Trimmomatic v 0.38 (5) and error correction  
15 performed using Musket v 1.1 (6). Corrected reads were subsequently mapped to the  
16 reference genome using SMALT v 0.7.6 ([https://www.sanger.ac.uk/science/tools/smalt-](https://www.sanger.ac.uk/science/tools/smalt-0)  
17 0) and polymorphisms identified using freebayes v 1.2.0 (7). All polymorphisms were  
18 filtered for depth of coverage ( $\geq 15$ -fold coverage), polymorphism frequency ( $\geq 75\%$ ), and  
19 quality (phred score  $\geq 10$ ). Resultant variant call format (VCF) files were processed  
20 using the custom python scripts prephix and phrecon  
21 (<https://github.com/codinghedgehog>) and phylogenetic trees generated using FastTree  
22 v 2.1.10 (8). Phylogenetic trees were visualized and manipulated in CLC Genomics  
23 Workbench v 12.0.1 (Qiagen, Valencia, CA). De novo assembly of short-read  
24 sequences was performed using SPAdes (9) and resultant contigs used to search the

25 ResFinder database (Center for Genomic Epidemiology,  
26 <https://cge.cbs.dtu.dk/services/ResFinder/>) for antimicrobial resistance genes using the  
27 Microbial Genomics module (v 3.6.1) of the CLC Genomics Workbench. Nucleotide  
28 sequence comparisons and visualizations were made using Easyfig (10).  
29

## 30 SUPPORTING TABLES

31  
32  
33

TABLE S1. Houston GAS strains used in whole genome sequencing.

| Strain   | Biosample <sup>a</sup> | Emm <sup>b</sup> | ST <sup>c</sup> | Year <sup>d</sup> | AG <sup>e</sup>               | MLS                   | Tet             | AG/MLS/Tet Phenotype <sup>f</sup> | Disease Type |
|----------|------------------------|------------------|-----------------|-------------------|-------------------------------|-----------------------|-----------------|-----------------------------------|--------------|
| TSPY155  | SAMN10172638           | 11               | 403             | 2013              |                               | <i>erm(B)</i>         | <i>tet(M)</i>   | S / R / R                         | Invasive     |
| TSPY376  | SAMN10172639           | 11               | 403             | 2014              |                               | <i>erm(B)</i>         | <i>tet(M)</i>   | S / R / R                         | Invasive     |
| TSPY555  | SAMN10172640           | 11               | 403             | 2015              |                               | <i>erm(B)</i>         | <i>tet(M)</i>   | S / R / R                         | Invasive     |
| TSPY682  | SAMN10172641           | 11               | 403             | 2015              |                               |                       |                 | S / S / S                         | Invasive     |
| TSPY711  | SAMN10172642           | 11               | 403             | 2015              | <i>aph(3')-III</i>            | <i>erm(B)</i>         | <i>tet(M)</i>   | R / R / R                         | Invasive     |
| TSPY784  | SAMN10172643           | 11               | 403             | 2016              |                               |                       | <i>tet(M)</i>   | S / S / R                         | SSTI         |
| TSPY942  | SAMN10172644           | 11               | 403             | 2016              |                               | <i>erm(B)</i>         | <i>tet(M)</i>   | S / R / R                         | SSTI         |
| TSPY1115 | SAMN10172645           | 11               | 403             | 2016              | <i>aph(3')-III</i>            | <i>erm(B)</i>         | <i>tet(M)</i>   | R / R / R                         | Invasive     |
| TSPY1165 | SAMN10172646           | 11               | 403             | 2017              | <i>aph(3')-III</i>            | <i>erm(B)</i>         | <i>tet(M)</i>   | R / R / R                         | Pharyngeal   |
| TSPY1172 | SAMN10172647           | 11               | 403             | 2017              |                               |                       | <i>tet(M)</i>   | S / S / R                         | SSTI         |
| TSPY1239 | SAMN10172648           | 11               | 403             | 2017              |                               |                       |                 | S / S / S                         | Pharyngeal   |
| TSPY197  | SAMN10172650           | 75               | 49              | 2014              |                               |                       |                 | - / S / S                         | Invasive     |
| TSPY208  | SAMN10172651           | 75               | 49              | 2014              |                               | <i>mef(A), msr(D)</i> |                 | - / R / S                         | Pharyngeal   |
| TSPY282  | SAMN10172652           | 75               | 39              | 2014              |                               |                       |                 | - / R / S                         | Invasive     |
| TSPY392  | SAMN10172653           | 75               | 49              | 2014              |                               | <i>mef(A), msr(D)</i> |                 | - / R / S                         | Invasive     |
| TSPY481  | SAMN10172654           | 75               | 49              | 2014              |                               |                       |                 | - / S / S                         | Pharyngeal   |
| TSPY519  | SAMN10172655           | 75               | NF              | 2014              |                               |                       | <i>tet(M)</i>   | - / S / R                         | Invasive     |
| TSPY679  | SAMN10172656           | 75               | 49              | 2015              |                               | <i>mef(A), msr(D)</i> |                 | - / R / S                         | Pharyngeal   |
| TSPY689  | SAMN10172657           | 75               | 49              | 2015              |                               | <i>mef(A), msr(D)</i> |                 | - / R / S                         | Invasive     |
| TSPY690  | SAMN10172658           | 75               | 49              | 2015              |                               |                       |                 | - / S / S                         | Pharyngeal   |
| TSPY700  | SAMN10172659           | 75               | 49              | 2015              |                               | <i>mef(A), msr(D)</i> | <i>tetA(46)</i> | - / R / S                         | Pharyngeal   |
| TSPY748  | SAMN10172660           | 75               | 49              | 2015              |                               | <i>mef(A), msr(D)</i> |                 | - / R / S                         | Pharyngeal   |
| TSPY923  | SAMN10172661           | 75               | 150             | 2016              |                               |                       |                 | - / S / S                         | Invasive     |
| TSPY979  | SAMN10172662           | 75               | 49              | 2016              |                               | <i>mef(A), msr(D)</i> |                 | - / R / S                         | Invasive     |
| TSPY985  | SAMN10172663           | 75               | 49              | 2016              |                               |                       |                 | - / S / S                         | Invasive     |
| TSPY1075 | SAMN10172664           | 75               | 49              | 2016              |                               |                       |                 | - / S / S                         | Pharyngeal   |
| TSPY1078 | SAMN10172665           | 75               | NF              | 2016              |                               |                       | <i>tet(M)</i>   | - / S / R                         | SSTI         |
| TSPY1091 | SAMN10172666           | 75               | 49              | 2016              |                               | <i>mef(A), msr(D)</i> |                 | - / R / S                         | Invasive     |
| TSPY1122 | SAMN10172667           | 75               | 49              | 2016              |                               |                       |                 | - / S / S                         | SSTI         |
| TSPY1231 | SAMN10172668           | 75               | 52              | 2017              |                               |                       |                 | - / S / S                         | Pharyngeal   |
| TSPY165  | SAMN10172669           | 77               | 133             | 2013              |                               |                       | <i>tet(M)</i>   | - / S / R                         | Invasive     |
| TSPY221  | SAMN10172670           | 77               | 399             | 2014              |                               |                       | <i>tet(M)</i>   | - / S / R                         | Invasive     |
| TSPY311  | SAMN10172671           | 77               | 63              | 2014              |                               | <i>erm(A)</i>         | <i>tet(O)</i>   | - / R / R                         | Pharyngeal   |
| TSPY373  | SAMN10172672           | 77               | 63              | 2014              |                               |                       | <i>tet(O)</i>   | - / S / R                         | Pharyngeal   |
| TSPY377  | SAMN10172673           | 77               | 63              | 2014              |                               | <i>erm(A)</i>         | <i>tet(O)</i>   | - / R / R                         | SSTI         |
| TSPY453  | SAMN10172674           | 77               | 63              | 2014              |                               | <i>erm(A)</i>         | <i>tet(O)</i>   | - / R / R                         | SSTI         |
| TSPY477  | SAMN10172675           | 77               | 63              | 2014              |                               |                       | <i>tet(O)</i>   | - / S / R                         | SSTI         |
| TSPY482  | SAMN10172676           | 77               | 63              | 2014              |                               |                       | <i>tet(O)</i>   | - / S / R                         | Invasive     |
| TSPY656  | SAMN10172677           | 77               | 63              | 2015              |                               |                       | <i>tet(O)</i>   | - / S / R                         | Invasive     |
| TSPY658  | SAMN10172678           | 77               | 63              | 2015              |                               | <i>erm(A)</i>         | <i>tet(O)</i>   | - / R / R                         | Pharyngeal   |
| TSPY670  | SAMN10172679           | 77               | 63              | 2015              |                               |                       | <i>tet(O)</i>   | - / S / R                         | Invasive     |
| TSPY673  | SAMN10172680           | 77               | 63              | 2015              |                               |                       | <i>tet(O)</i>   | - / S / R                         | Pharyngeal   |
| TSPY695  | SAMN10172681           | 77               | 63              | 2015              |                               |                       | <i>tet(O)</i>   | - / S / R                         | SSTI         |
| TSPY788  | SAMN10172682           | 77               | 63              | 2016              |                               |                       | <i>tet(M)</i>   | - / S / R                         | Pharyngeal   |
| TSPY886  | SAMN10172683           | 77               | 63              | 2016              |                               | <i>erm(A)</i>         | <i>tet(O)</i>   | - / R / R                         | SSTI         |
| TSPY981  | SAMN10172684           | 77               | 63              | 2016              |                               |                       | <i>tet(O)</i>   | - / S / R                         | SSTI         |
| TSPY1030 | SAMN10172685           | 77               | 63              | 2016              |                               |                       | <i>tet(O)</i>   | - / S / R                         | Invasive     |
| TSPY1126 | SAMN10172686           | 77               | 63              | 2016              |                               | <i>erm(A)</i>         | <i>tet(O)</i>   | - / R / R                         | Invasive     |
| TSPY1151 | SAMN10172687           | 77               | 63              | 2017              |                               |                       | <i>tet(O)</i>   | - / S / R                         | Pharyngeal   |
| TSPY1153 | SAMN10172688           | 77               | 63              | 2017              |                               | <i>erm(A)</i>         | <i>tet(O)</i>   | - / R / R                         | SSTI         |
| TSPY1177 | SAMN10172689           | 77               | 63              | 2017              |                               |                       | <i>tet(O)</i>   | - / S / R                         | SSTI         |
| TSPY1260 | SAMN10172690           | 77               | 63              | 2017              |                               |                       | <i>tet(O)</i>   | - / S / R                         | Pharyngeal   |
| TSPY556  | SAMN10172691           | 92               | 82              | 2015              | <i>ant(6)-Ia, aph(3')-III</i> | <i>erm(T)</i>         | <i>tet(M)</i>   | R / R / R <sup>g</sup>            | Invasive     |
| TSPY783  | SAMN10172692           | 92               | 82              | 2016              | <i>ant(6)-Ia, aph(3')-III</i> | <i>erm(T)</i>         | <i>tet(M)</i>   | R / R / R                         | Invasive     |
| TSPY854  | SAMN10172693           | 92               | 82              | 2016              | <i>ant(6)-Ia, aph(3')-III</i> | <i>erm(T)</i>         | <i>tet(M)</i>   | R / R / R                         | Invasive     |

|          |              |    |    |      |                               |               |               |           |          |
|----------|--------------|----|----|------|-------------------------------|---------------|---------------|-----------|----------|
| TSPY1042 | SAMN10172694 | 92 | 82 | 2016 | <i>ant(6)-Ia, aph(3')-III</i> | <i>erm(T)</i> | <i>tet(M)</i> | R / R / R | SSTI     |
| TSPY1076 | SAMN10172695 | 92 | 82 | 2016 | <i>ant(6)-Ia, aph(3')-III</i> | <i>erm(T)</i> | <i>tet(M)</i> | R / R / R | Invasive |
| TSPY1089 | SAMN10172696 | 92 | 82 | 2016 | <i>ant(6)-Ia, aph(3')-III</i> | <i>erm(T)</i> | <i>tet(M)</i> | R / R / R | SSTI     |
| TSPY1195 | SAMN10172697 | 92 | 82 | 2017 | <i>ant(6)-Ia, aph(3')-III</i> | <i>erm(T)</i> | <i>tet(M)</i> | R / R / R | Invasive |
| TSPY1218 | SAMN10172698 | 92 | 82 | 2017 | <i>ant(6)-Ia, aph(3')-III</i> | <i>erm(T)</i> | <i>tet(M)</i> | R / R / R | SSTI     |
| TSPY1227 | SAMN10172699 | 92 | 82 | 2017 | <i>ant(6)-Ia, aph(3')-III</i> | <i>erm(T)</i> | <i>tet(M)</i> | R / R / R | Invasive |
| TSPY1285 | SAMN10172700 | 92 | 82 | 2017 | <i>ant(6)-Ia, aph(3')-III</i> | <i>erm(T)</i> | <i>tet(M)</i> | R / R / R | SSTI     |
| TSPY1287 | SAMN10172701 | 92 | 82 | 2017 | <i>ant(6)-Ia, aph(3')-III</i> | <i>erm(T)</i> | <i>tet(M)</i> | R / R / R | SSTI     |

34 <sup>a</sup> Biosample number under BioProject PRJNA494557.

35 <sup>b</sup> GAS *emm* type determined as described in Methods.

36 <sup>c</sup> Sequence type (ST) determined as described in Methods.

37 <sup>d</sup> Year of isolation.

38 <sup>e</sup> Antimicrobial resistance genes identified through bioinformatics pipeline defined in Methods for  
39 aminoglycosides (AG), macrolide-lincosamide-streptogramin (MLS), tetracycline (TET).

40 <sup>f</sup> Antimicrobial resistance phenotypes of susceptible (S), intermediate (I), and resistant (R) as  
41 determined by Etest or by broth microdilution in the case of aminoglycoside resistance in  
42 *emm11* and *emm92* isolates. A dash (-) indicates phenotype not tested.

43 <sup>g</sup> Tetracycline susceptibility in all *emm92* GAS showed resistance by disk diffusion but  
44 intermediate by Etest.

45 TABLE S2. CDC ABCs strains used in this study.  
46

| Biosample <sup>a</sup> | Emm <sup>b</sup> | ST <sup>c</sup> | Year <sup>d</sup> | AG <sup>e</sup>    | MLS                  | Tet           |
|------------------------|------------------|-----------------|-------------------|--------------------|----------------------|---------------|
| SAMN07154200           | 11               | 403             | 2015              | <i>aph(3')-III</i> | <i>erm(B)</i>        | <i>tet(M)</i> |
| SAMN07154022           | 11               | 403             | 2015              |                    |                      |               |
| SAMN07154013           | 11               | 403             | 2015              | <i>aph(3')-III</i> | <i>erm(B)</i>        | <i>tet(M)</i> |
| SAMN07154148           | 11               | 403             | 2015              |                    | <i>erm(B)</i>        | <i>tet(M)</i> |
| SAMN07154044           | 11               | 403             | 2015              |                    |                      |               |
| SAMN07154047           | 11               | 403             | 2015              |                    | <i>erm(B)</i>        | <i>tet(M)</i> |
| SAMN07154333           | 11               | 403             | 2015              |                    |                      |               |
| SAMN07154365           | 11               | 403             | 2015              | <i>aph(3')-III</i> | <i>erm(B)</i>        | <i>tet(M)</i> |
| SAMN07154415           | 11               | 403             | 2015              |                    |                      |               |
| SAMN07154002           | 11               | 403             | 2015              |                    | <i>erm(A)</i>        |               |
| SAMN07154174           | 11               | 403             | 2015              | <i>aph(3')-III</i> | <i>erm(B)</i>        | <i>tet(M)</i> |
| SAMN07154035           | 11               | 403             | 2015              | <i>aph(3')-III</i> | <i>erm(A)</i>        | <i>tet(M)</i> |
| SAMN07154375           | 11               | 403             | 2015              | <i>aph(3')-III</i> | <i>erm(B)</i>        | <i>tet(M)</i> |
| SAMN07154249           | 11               | 403             | 2015              |                    | <i>erm(B)</i>        | <i>tet(M)</i> |
| SAMN07154100           | 11               | 403             | 2015              |                    | <i>erm(B)</i>        | <i>tet(M)</i> |
| SAMN07154134           | 11               | 403             | 2015              |                    |                      |               |
| SAMN07153831           | 11               | 403             | 2015              |                    | <i>erm(B)</i>        | <i>tet(M)</i> |
| SAMN07153877           | 11               | 403             | 2015              | <i>aph(3')-III</i> | <i>erm(B)</i>        | <i>tet(M)</i> |
| SAMN07153542           | 11               | 403             | 2015              |                    | <i>erm(A)</i>        | <i>tet(M)</i> |
| SAMN07153543           | 11               | 403             | 2015              |                    | <i>erm(B)</i>        | <i>tet(M)</i> |
| SAMN07153661           | 11               | 403             | 2015              |                    |                      |               |
| SAMN07153563           | 11               | 403             | 2015              |                    |                      |               |
| SAMN07153811           | 11               | 403             | 2015              | <i>aph(3')-III</i> | <i>erm(B)</i>        | <i>tet(M)</i> |
| SAMN07153939           | 11               | 403             | 2015              | <i>aph(3')-III</i> | <i>erm(B)</i>        | <i>tet(M)</i> |
| SAMN07153523           | 11               | 403             | 2015              |                    | <i>erm(B)</i>        | <i>tet(M)</i> |
| SAMN07153636           | 11               | 403             | 2015              | <i>aph(3')-III</i> | <i>erm(B)</i>        | <i>tet(M)</i> |
| SAMN07153839           | 11               | 403             | 2015              |                    | <i>erm(B)</i>        | <i>tet(M)</i> |
| SAMN07153841           | 11               | 403             | 2015              | <i>aph(3')-III</i> | <i>erm(B)</i>        | <i>tet(M)</i> |
| SAMN07153871           | 11               | 403             | 2015              |                    | <i>erm(B)</i>        | <i>tet(M)</i> |
| SAMN07153834           | 11               | 403             | 2015              | <i>aph(3')-III</i> | <i>erm(B),isa(C)</i> | <i>tet(M)</i> |
| SAMN07153531           | 11               | 403             | 2015              |                    | <i>erm(B)</i>        | <i>tet(M)</i> |
| SAMN07153530           | 11               | 403             | 2015              |                    | <i>erm(B)</i>        | <i>tet(M)</i> |
| SAMN07153587           | 11               | 403             | 2015              | <i>aph(3')-III</i> | <i>erm(B)</i>        | <i>tet(M)</i> |
| SAMN07153851           | 11               | 403             | 2015              |                    | <i>erm(B)</i>        | <i>tet(M)</i> |
| SAMN07153956           | 11               | 403             | 2015              |                    |                      |               |
| SAMN07153276           | 11               | 403             | 2015              | <i>aph(3')-III</i> | <i>erm(B)</i>        | <i>tet(M)</i> |
| SAMN07153371           | 11               | 403             | 2015              | <i>ant(6)-Ia</i>   | <i>erm(A)</i>        | <i>tet(M)</i> |
| SAMN07152980           | 11               | 403             | 2015              |                    |                      |               |
| SAMN07153216           | 11               | 403             | 2015              |                    | <i>erm(B)</i>        | <i>tet(M)</i> |
| SAMN07153339           | 11               | 403             | 2015              | <i>aph(3')-III</i> | <i>erm(B)</i>        | <i>tet(M)</i> |
| SAMN07153083           | 11               | 403             | 2015              |                    | <i>erm(B)</i>        | <i>tet(M)</i> |
| SAMN07153194           | 11               | 403             | 2015              |                    |                      |               |
| SAMN07153301           | 11               | 403             | 2015              |                    |                      |               |
| SAMN07153348           | 11               | 403             | 2015              | <i>aph(3')-III</i> | <i>erm(B)</i>        | <i>tet(M)</i> |
| SAMN07153312           | 11               | 403             | 2015              |                    |                      |               |
| SAMN07153157           | 11               | 403             | 2015              | <i>aph(3')-III</i> | <i>erm(B)</i>        | <i>tet(M)</i> |
| SAMN07153195           | 11               | 907             | 2015              |                    |                      | <i>tet(M)</i> |
| SAMN07153029           | 11               | 403             | 2015              | <i>aph(3')-III</i> | <i>erm(B)</i>        | <i>tet(M)</i> |
| SAMN07153324           | 11               | 403             | 2015              |                    | <i>erm(B)</i>        | <i>tet(M)</i> |
| SAMN07153323           | 11               | 403             | 2015              |                    | <i>erm(B)</i>        | <i>tet(M)</i> |
| SAMN07153315           | 11               | 403             | 2015              |                    |                      |               |
| SAMN08691522           | 11               | 403             | 2016              |                    |                      |               |
| SAMN08690626           | 11               | 403             | 2016              | <i>aph(3')-III</i> | <i>erm(B)</i>        | <i>tet(M)</i> |
| SAMN08691305           | 11               | 403             | 2016              |                    | <i>erm(B)</i>        | <i>tet(M)</i> |
| SAMN08691063           | 11               | 403             | 2016              |                    |                      |               |
| SAMN08691462           | 11               | 403             | 2016              | <i>aph(3')-III</i> | <i>erm(B)</i>        | <i>tet(M)</i> |
| SAMN08691471           | 11               | 403             | 2016              |                    | <i>erm(B)</i>        | <i>tet(M)</i> |
| SAMN08691010           | 11               | 403             | 2016              |                    | <i>erm(B)</i>        | <i>tet(M)</i> |
| SAMN08691383           | 11               | 403             | 2016              | <i>aph(3')-III</i> | <i>erm(B)</i>        | <i>tet(M)</i> |
| SAMN08691169           | 11               | 403             | 2016              |                    | <i>erm(B)</i>        | <i>tet(M)</i> |
| SAMN08690938           | 11               | 403             | 2016              |                    |                      |               |
| SAMN08691095           | 11               | 403             | 2016              | <i>aph(3')-III</i> | <i>erm(B)</i>        | <i>tet(M)</i> |
| SAMN08690789           | 11               | 403             | 2015              | <i>aph(3')-III</i> | <i>erm(B)</i>        | <i>tet(M)</i> |

|              |    |      |      |                    |               |               |
|--------------|----|------|------|--------------------|---------------|---------------|
| SAMN08690934 | 11 | 403  | 2016 | <i>aph(3')-III</i> | <i>erm(B)</i> | <i>tet(M)</i> |
| SAMN08691400 | 11 | 403  | 2016 | <i>aph(3')-III</i> | <i>erm(B)</i> | <i>tet(M)</i> |
| SAMN08691399 | 11 | 403  | 2016 |                    |               |               |
| SAMN08690671 | 11 | 403  | 2016 | <i>aph(3')-III</i> | <i>erm(B)</i> | <i>tet(M)</i> |
| SAMN08690674 | 11 | 403  | 2016 | <i>aph(3')-III</i> | <i>erm(B)</i> | <i>tet(M)</i> |
| SAMN08691482 | 11 | 403  | 2016 |                    | <i>erm(B)</i> | <i>tet(M)</i> |
| SAMN08690636 | 11 | 403  | 2016 | <i>aph(3')-III</i> | <i>erm(B)</i> | <i>tet(M)</i> |
| SAMN08691264 | 11 | 403  | 2016 |                    | <i>erm(B)</i> | <i>tet(M)</i> |
| SAMN08691257 | 11 | 403  | 2016 |                    | <i>erm(B)</i> | <i>tet(M)</i> |
| SAMN08690706 | 11 | 403  | 2016 | <i>aph(3')-III</i> | <i>erm(B)</i> | <i>tet(M)</i> |
| SAMN08691214 | 11 | 403  | 2016 | <i>aph(3')-III</i> | <i>erm(B)</i> | <i>tet(M)</i> |
| SAMN08690877 | 11 | 403  | 2016 |                    | <i>erm(B)</i> | <i>tet(M)</i> |
| SAMN08691355 | 11 | 403  | 2016 | <i>aph(3')-III</i> | <i>erm(B)</i> | <i>tet(M)</i> |
| SAMN08690991 | 11 | 952  | 2016 |                    |               |               |
| SAMN08691274 | 11 | 403  | 2016 | <i>aph(3')-III</i> | <i>erm(B)</i> | <i>tet(M)</i> |
| SAMN08690713 | 11 | 403  | 2016 | <i>aph(3')-III</i> | <i>erm(B)</i> | <i>tet(M)</i> |
| SAMN08691483 | 11 | 403  | 2016 |                    | <i>erm(B)</i> | <i>tet(M)</i> |
| SAMN08692115 | 11 | 403  | 2016 |                    | <i>erm(B)</i> | <i>tet(M)</i> |
| SAMN08692120 | 11 | 403  | 2017 | <i>aph(3')-III</i> | <i>erm(B)</i> | <i>tet(M)</i> |
| SAMN08692123 | 11 | 403  | 2017 | <i>aph(3')-III</i> | <i>erm(B)</i> | <i>tet(M)</i> |
| SAMN08691587 | 11 | 403  | 2016 | <i>aph(3')-III</i> | <i>erm(B)</i> | <i>tet(M)</i> |
| SAMN08691874 | 11 | 403  | 2016 |                    | <i>erm(B)</i> | <i>tet(M)</i> |
| SAMN08692184 | 11 | 403  | 2017 |                    |               |               |
| SAMN08692283 | 11 | 403  | 2017 | <i>aph(3')-III</i> | <i>erm(B)</i> | <i>tet(M)</i> |
| SAMN08692461 | 11 | 403  | 2017 |                    | <i>erm(B)</i> | <i>tet(M)</i> |
| SAMN08691889 | 11 | 403  | 2016 |                    | <i>erm(B)</i> | <i>tet(M)</i> |
| SAMN08692271 | 11 | 403  | 2017 |                    | <i>erm(B)</i> | <i>tet(M)</i> |
| SAMN08692238 | 11 | 403  | 2017 | <i>aph(3')-III</i> | <i>erm(B)</i> | <i>tet(M)</i> |
| SAMN08691826 | 11 | 403  | 2016 |                    | <i>erm(B)</i> | <i>tet(M)</i> |
| SAMN08691802 | 11 | 403  | 2016 |                    | <i>erm(B)</i> | <i>tet(M)</i> |
| SAMN08691699 | 11 | 403  | 2016 | <i>aph(3')-III</i> | <i>erm(B)</i> | <i>tet(M)</i> |
| SAMN08692360 | 11 | 403  | 2016 |                    | <i>erm(B)</i> | <i>tet(M)</i> |
| SAMN08692218 | 11 | 403  | 2017 | <i>aph(3')-III</i> | <i>erm(B)</i> | <i>tet(M)</i> |
| SAMN08692277 | 11 | 403  | 2017 | <i>aph(3')-III</i> | <i>erm(B)</i> | <i>tet(M)</i> |
| SAMN08692282 | 11 | 403  | 2017 | <i>aph(3')-III</i> | <i>erm(B)</i> | <i>tet(M)</i> |
| SAMN08691723 | 11 | 403  | 2016 | <i>aph(3')-III</i> | <i>erm(B)</i> | <i>tet(M)</i> |
| SAMN08691861 | 11 | 403  | 2016 |                    | <i>erm(B)</i> | <i>tet(M)</i> |
| SAMN08692087 | 11 | 403  | 2016 | <i>aph(3')-III</i> | <i>erm(B)</i> | <i>tet(M)</i> |
| SAMN08692018 | 11 | 403  | 2016 | <i>aph(3')-III</i> | <i>erm(A)</i> | <i>tet(M)</i> |
| SAMN08692015 | 11 | 403  | 2016 |                    |               |               |
| SAMN08692371 | 11 | 403  | 2016 |                    | <i>erm(B)</i> | <i>tet(M)</i> |
| SAMN08692017 | 11 | 403  | 2016 | <i>aph(3')-III</i> | <i>erm(A)</i> | <i>tet(M)</i> |
| SAMN08691617 | 11 | 403  | 2016 | <i>aph(3')-III</i> | <i>erm(B)</i> | <i>tet(M)</i> |
| SAMN08692010 | 11 | 403  | 2016 |                    |               |               |
| SAMN08692210 | 11 | 403  | 2016 |                    | <i>erm(B)</i> | <i>tet(M)</i> |
| SAMN08692476 | 11 | 403  | 2017 |                    | <i>erm(B)</i> | <i>tet(M)</i> |
| SAMN08692137 | 11 | 403  | 2016 |                    | <i>erm(B)</i> | <i>tet(M)</i> |
| SAMN08691659 | 11 | 403  | 2016 | <i>aph(3')-III</i> | <i>erm(B)</i> | <i>tet(M)</i> |
| SAMN08691871 | 11 | 403  | 2016 | <i>aph(3')-III</i> | <i>erm(B)</i> | <i>tet(M)</i> |
| SAMN08692176 | 11 | 403  | 2017 | <i>aph(3')-III</i> | <i>erm(B)</i> | <i>tet(M)</i> |
| SAMN08691777 | 11 | 403  | 2016 | <i>aph(3')-III</i> | <i>erm(B)</i> | <i>tet(M)</i> |
| SAMN08692201 | 11 | 403  | 2016 | <i>aph(3')-III</i> | <i>erm(B)</i> | <i>tet(M)</i> |
| SAMN08692125 | 11 | 403  | 2017 | <i>aph(3')-III</i> | <i>erm(B)</i> | <i>tet(M)</i> |
| SAMN08691734 | 11 | 403  | 2016 |                    | <i>erm(B)</i> | <i>tet(M)</i> |
| SAMN08691880 | 11 | 403  | 2016 |                    | <i>erm(B)</i> | <i>tet(M)</i> |
| SAMN08691877 | 11 | 403  | 2016 |                    |               |               |
| SAMN08691988 | 11 | 403  | 2016 |                    | <i>erm(B)</i> | <i>tet(M)</i> |
| SAMN08692073 | 11 | 403  | 2016 |                    | <i>erm(B)</i> | <i>tet(M)</i> |
| SAMN08692339 | 11 | 952  | 2016 |                    |               |               |
| SAMN08691566 | 11 | 403  | 2016 | <i>aph(3')-III</i> | <i>erm(B)</i> | <i>tet(M)</i> |
| SAMN08692090 | 11 | 403  | 2016 | <i>aph(3')-III</i> | <i>erm(B)</i> | <i>tet(M)</i> |
| SAMN08692789 | 11 | 403  | 2017 | <i>aph(3')-III</i> | <i>erm(B)</i> | <i>tet(M)</i> |
| SAMN08692828 | 11 | 403  | 2017 |                    |               |               |
| SAMN08692702 | 11 | 1047 | 2017 |                    | <i>erm(B)</i> | <i>tet(M)</i> |
| SAMN08692547 | 11 | 403  | 2017 |                    |               |               |
| SAMN08692698 | 11 | 403  | 2017 | <i>aph(3')-III</i> | <i>erm(B)</i> | <i>tet(M)</i> |

|              |    |     |      |            |               |        |
|--------------|----|-----|------|------------|---------------|--------|
| SAMN08692816 | 11 | 403 | 2017 |            |               |        |
| SAMN08692783 | 11 | 403 | 2017 |            | erm(B)        | tet(M) |
| SAMN08692624 | 11 | 403 | 2017 |            | erm(B)        | tet(M) |
| SAMN08692593 | 11 | 403 | 2017 | aph(3)-III | erm(B)        | tet(M) |
| SAMN08692716 | 11 | 403 | 2016 | aph(3)-III | erm(B)        | tet(M) |
| SAMN08692610 | 11 | 403 | 2017 |            | erm(B)        | tet(M) |
| SAMN08692644 | 11 | 403 | 2017 | aph(3)-III | erm(B)        | tet(M) |
| SAMN08692599 | 11 | 403 | 2017 | aph(3)-III | erm(B)        | tet(M) |
| SAMN08692962 | 11 | 403 | 2017 |            | erm(B)        | tet(M) |
| SAMN08692963 | 11 | 403 | 2017 |            | erm(B)        | tet(M) |
| SAMN08693151 | 11 | 403 | 2017 | aph(3)-III | erm(B)        | tet(M) |
| SAMN08693000 | 11 | 403 | 2017 | aph(3)-III |               | tet(M) |
| SAMN08693053 | 11 | 403 | 2017 | aph(3)-III | erm(B)        | tet(M) |
| SAMN08692959 | 11 | 403 | 2017 | aph(3)-III | erm(B),isa(C) | tet(M) |
| SAMN08692958 | 11 | 403 | 2017 |            | erm(B)        | tet(M) |
| SAMN08692860 | 11 | 403 | 2017 |            | erm(B)        | tet(M) |
| SAMN08693011 | 11 | 403 | 2017 | aph(3)-III | erm(B)        | tet(M) |
| SAMN08693256 | 11 | 403 | 2017 |            | erm(A)        | tet(M) |
| SAMN08693254 | 11 | 403 | 2017 |            | erm(A)        | tet(M) |
| SAMN08693255 | 11 | 403 | 2017 |            | erm(A)        | tet(M) |
| SAMN0849266  | 11 | 403 | 2017 | aph(3)-III | erm(B)        | tet(M) |
| SAMN0849748  | 11 | 403 | 2017 |            | erm(A)        | tet(M) |
| SAMN0849870  | 11 | 403 | 2017 |            | erm(A)        | tet(M) |
| SAMN0849872  | 11 | 403 | 2017 |            | erm(A)        | tet(M) |
| SAMN0849526  | 11 | 403 | 2017 | aph(3)-III | erm(B)        | tet(M) |
| SAMN0849531  | 11 | 403 | 2017 | aph(3)-III | erm(B)        | tet(M) |
| SAMN0849532  | 11 | 403 | 2017 |            | erm(B)        | tet(M) |
| SAMN0849649  | 11 | 403 | 2017 | aph(3)-III | erm(B)        | tet(M) |
| SAMN0849600  | 11 | 403 | 2017 | aph(3)-III | erm(B)        | tet(M) |
| SAMN0849236  | 11 | 403 | 2017 | aph(3)-III | erm(B)        | tet(M) |
| SAMN0849827  | 11 | 403 | 2017 |            |               |        |
| SAMN0849205  | 11 | 403 | 2017 |            | erm(B)        | tet(M) |
| SAMN0849613  | 11 | 403 | 2017 | aph(3)-III | erm(B)        | tet(M) |
| SAMN0849723  | 11 | 403 | 2018 |            | erm(A)        | tet(M) |
| SAMN0848982  | 11 | 403 | 2016 |            | erm(B)        | tet(M) |
| SAMN0848980  | 11 | 403 | 2016 |            |               |        |
| SAMN0849784  | 11 | 403 | 2017 | aph(3)-III | erm(B)        | tet(M) |
| SAMN0849882  | 11 | 403 | 2017 |            |               |        |
| SAMN0849879  | 11 | 403 | 2017 |            | erm(A)        | tet(M) |
| SAMN0849876  | 11 | 403 | 2017 |            | erm(A)        | tet(M) |
| SAMN0849341  | 11 | 403 | 2017 | aph(3)-III | erm(B)        | tet(M) |
| SAMN0849338  | 11 | 403 | 2017 | aph(3)-III | erm(B)        | tet(M) |
| SAMN0849837  | 11 | 403 | 2017 |            | erm(A)        | tet(M) |
| SAMN0849054  | 11 | 403 | 2017 | aph(3)-III | erm(B)        | tet(M) |
| SAMN0849469  | 11 | 403 | 2017 | aph(3)-III | erm(B)        | tet(M) |
| SAMN0849510  | 11 | 403 | 2017 |            |               |        |
| SAMN0849332  | 11 | 403 | 2017 |            |               |        |
| SAMN0848917  | 11 | 403 | 2016 | aph(3)-III | erm(B)        | tet(M) |
| SAMN0849239  | 11 | 403 | 2017 | aph(3)-III | erm(B)        | tet(M) |
| SAMN0849196  | 11 | 403 | 2017 | aph(3)-III | erm(B)        | tet(M) |
| SAMN0849805  | 11 | 403 | 2017 |            | erm(A)        | tet(M) |
| SAMN0849626  | 11 | 403 | 2017 |            | erm(B)        | tet(M) |
| SAMN0849400  | 11 | 403 | 2017 |            | erm(B)        | tet(M) |
| SAMN0849376  | 11 | 403 | 2017 |            | erm(B)        | tet(M) |
| SAMN0849112  | 11 | 403 | 2017 |            |               |        |
| SAMN0849503  | 11 | 403 | 2017 | aph(3)-III | erm(B)        | tet(M) |
| SAMN0849128  | 11 | 403 | 2017 | aph(3)-III | erm(B)        | tet(M) |
| SAMN0849710  | 11 | 403 | 2017 |            | erm(A)        | tet(M) |
| SAMN0849763  | 11 | 403 | 2017 |            |               |        |
| SAMN0849760  | 11 | 403 | 2017 |            |               |        |
| SAMN0849762  | 11 | 403 | 2017 |            | erm(A)        | tet(M) |
| SAMN0849847  | 11 | 403 | 2017 |            | erm(A)        | tet(M) |
| SAMN0849877  | 11 | 403 | 2017 |            | erm(A)        | tet(M) |
| SAMN0849210  | 11 | 403 | 2017 |            | erm(B)        | tet(M) |
| SAMN0849301  | 11 | 403 | 2017 |            | erm(B)        | tet(M) |
| SAMN0849722  | 11 | 403 | 2018 |            | erm(A)        | tet(M) |

|              |    |     |      |  |                      |               |
|--------------|----|-----|------|--|----------------------|---------------|
| SAMN09849767 | 11 | 403 | 2017 |  | <i>erm(A)</i>        | <i>tet(M)</i> |
| SAMN09849849 | 11 | 403 | 2017 |  | <i>erm(A)</i>        | <i>tet(M)</i> |
| SAMN09849901 | 11 | 403 | 2017 |  |                      |               |
| SAMN09849565 | 11 | 403 | 2017 |  |                      |               |
| SAMN07154009 | 75 | 49  | 2015 |  |                      |               |
| SAMN07154008 | 75 | 49  | 2015 |  |                      |               |
| SAMN07154006 | 75 | 49  | 2015 |  |                      |               |
| SAMN07153882 | 75 | 49  | 2015 |  |                      |               |
| SAMN07153580 | 75 | 150 | 2015 |  |                      |               |
| SAMN07153581 | 75 | 861 | 2015 |  | <i>mef(A) msr(D)</i> |               |
| SAMN07153621 | 75 | 49  | 2015 |  |                      |               |
| SAMN07153720 | 75 | 150 | 2015 |  |                      |               |
| SAMN07153605 | 75 | 49  | 2015 |  |                      |               |
| SAMN07153724 | 75 | 150 | 2015 |  |                      |               |
| SAMN07153598 | 75 | 49  | 2015 |  |                      |               |
| SAMN07153873 | 75 | 49  | 2015 |  |                      |               |
| SAMN07153373 | 75 | 150 | 2015 |  |                      |               |
| SAMN07153116 | 75 | 851 | 2015 |  |                      |               |
| SAMN07153061 | 75 | 150 | 2015 |  |                      |               |
| SAMN07153310 | 75 | 49  | 2015 |  | <i>mef(A) msr(D)</i> |               |
| SAMN07152970 | 75 | 49  | 2015 |  |                      |               |
| SAMN07153361 | 75 | 49  | 2015 |  | <i>mef(A) msr(D)</i> |               |
| SAMN07153141 | 75 | 150 | 2015 |  |                      |               |
| SAMN07153097 | 75 | 49  | 2015 |  |                      |               |
| SAMN08690691 | 75 | 49  | 2016 |  |                      |               |
| SAMN08691520 | 75 | 150 | 2016 |  |                      |               |
| SAMN08691299 | 75 | 49  | 2016 |  |                      |               |
| SAMN08691245 | 75 | 49  | 2016 |  | <i>mef(A) msr(D)</i> |               |
| SAMN08690561 | 75 | 150 | 2016 |  | <i>erm(B)</i>        | <i>tet(M)</i> |
| SAMN08690881 | 75 | 49  | 2016 |  |                      |               |
| SAMN08691226 | 75 | 49  | 2016 |  |                      |               |
| SAMN08690783 | 75 | 150 | 2016 |  |                      |               |
| SAMN08690787 | 75 | 49  | 2016 |  |                      |               |
| SAMN08691079 | 75 | 49  | 2016 |  |                      |               |
| SAMN08691080 | 75 | 49  | 2016 |  | <i>mef(A) msr(D)</i> |               |
| SAMN08691083 | 75 | 861 | 2016 |  | <i>mef(A) msr(D)</i> |               |
| SAMN08691147 | 75 | 150 | 2016 |  |                      |               |
| SAMN08690968 | 75 | 150 | 2016 |  |                      |               |
| SAMN08691071 | 75 | 49  | 2016 |  |                      |               |
| SAMN08691255 | 75 | 150 | 2016 |  |                      |               |
| SAMN08690596 | 75 | 49  | 2016 |  |                      |               |
| SAMN08690940 | 75 | 49  | 2016 |  | <i>mef(A) msr(D)</i> |               |
| SAMN08690794 | 75 | 49  | 2016 |  |                      |               |
| SAMN08690967 | 75 | 150 | 2016 |  |                      |               |
| SAMN08690578 | 75 | 150 | 2016 |  |                      |               |
| SAMN08690538 | 75 | 49  | 2015 |  |                      |               |
| SAMN08690937 | 75 | 150 | 2016 |  |                      |               |
| SAMN08690907 | 75 | 49  | 2016 |  |                      |               |
| SAMN08690767 | 75 | 861 | 2016 |  | <i>mef(A) msr(D)</i> |               |
| SAMN08691453 | 75 | 49  | 2016 |  |                      |               |
| SAMN08691481 | 75 | 49  | 2016 |  |                      |               |
| SAMN08692456 | 75 | 49  | 2017 |  | <i>mef(A) msr(D)</i> |               |
| SAMN08691729 | 75 | 150 | 2016 |  |                      |               |
| SAMN08691730 | 75 | 150 | 2016 |  |                      |               |
| SAMN08691731 | 75 | 150 | 2016 |  |                      |               |
| SAMN08692244 | 75 | 49  | 2017 |  | <i>mef(A) msr(D)</i> |               |
| SAMN08692061 | 75 | 49  | 2016 |  |                      |               |
| SAMN08691524 | 75 | 150 | 2016 |  |                      |               |
| SAMN08691933 | 75 | 150 | 2016 |  |                      |               |
| SAMN08692408 | 75 | 49  | 2017 |  |                      |               |
| SAMN08692149 | 75 | 49  | 2016 |  |                      |               |
| SAMN08691986 | 75 | 150 | 2016 |  |                      |               |
| SAMN08691628 | 75 | 49  | 2016 |  |                      |               |
| SAMN08692779 | 75 | 49  | 2017 |  |                      |               |
| SAMN08692775 | 75 | 49  | 2017 |  |                      |               |
| SAMN08692613 | 75 | 49  | 2017 |  | <i>mef(A) msr(D)</i> |               |



|              |    |      |      |                    |                      |               |
|--------------|----|------|------|--------------------|----------------------|---------------|
| SAMN08692546 | 75 | 49   | 2017 |                    | <i>mef(A) msr(D)</i> |               |
| SAMN08692804 | 75 | 150  | 2017 |                    | <i>erm(B)</i>        | <i>tet(M)</i> |
| SAMN08692645 | 75 | 49   | 2017 |                    |                      |               |
| SAMN08692655 | 75 | 49   | 2017 |                    |                      |               |
| SAMN08692762 | 75 | 49   | 2017 |                    |                      |               |
| SAMN08692911 | 75 | 49   | 2017 |                    |                      |               |
| SAMN08693160 | 75 | 150  | 2017 |                    | <i>erm(B)</i>        | <i>tet(M)</i> |
| SAMN08692968 | 75 | 49   | 2017 |                    | <i>mef(A) msr(D)</i> |               |
| SAMN08692891 | 75 | 150  | 2017 |                    |                      |               |
| SAMN08693024 | 75 | 150  | 2017 |                    |                      |               |
| SAMN08692834 | 75 | 1051 | 2017 |                    |                      |               |
| SAMN08692992 | 75 | 49   | 2017 |                    | <i>mef(A) msr(D)</i> |               |
| SAMN09849527 | 75 | 150  | 2017 |                    | <i>erm(B)</i>        | <i>tet(M)</i> |
| SAMN09849144 | 75 | 150  | 2017 |                    | <i>erm(B)</i>        | <i>tet(M)</i> |
| SAMN09849606 | 75 | 150  | 2017 |                    |                      |               |
| SAMN09849610 | 75 | 49   | 2017 |                    |                      |               |
| SAMN09849776 | 75 | 150  | 2017 |                    |                      |               |
| SAMN09849234 | 75 | 150  | 2017 |                    | <i>erm(B)</i>        | <i>tet(M)</i> |
| SAMN09849618 | 75 | 150  | 2017 |                    | <i>erm(B)</i>        | <i>tet(M)</i> |
| SAMN09849622 | 75 | 150  | 2017 |                    | <i>erm(B)</i>        | <i>tet(M)</i> |
| SAMN09849490 | 75 | 49   | 2017 |                    |                      |               |
| SAMN09848999 | 75 | 49   | 2017 |                    |                      |               |
| SAMN09849739 | 75 | 150  | 2017 |                    | <i>erm(B)</i>        | <i>tet(M)</i> |
| SAMN09849260 | 75 | 49   | 2017 |                    |                      |               |
| SAMN09849297 | 75 | 49   | 2017 |                    |                      |               |
| SAMN09848995 | 75 | 49   | 2017 |                    |                      |               |
| SAMN07154225 | 77 | 133  | 2015 |                    |                      | <i>tet(M)</i> |
| SAMN07154226 | 77 | 133  | 2015 |                    |                      | <i>tet(M)</i> |
| SAMN07154187 | 77 | 63   | 2015 |                    | <i>erm(A)</i>        | <i>tet(O)</i> |
| SAMN07154188 | 77 | 399  | 2015 |                    | <i>erm(T)</i>        | <i>tet(M)</i> |
| SAMN07154190 | 77 | 63   | 2015 |                    | <i>erm(A)</i>        | <i>tet(O)</i> |
| SAMN07154004 | 77 | 63   | 2015 |                    | <i>erm(A)</i>        | <i>tet(O)</i> |
| SAMN07154081 | 77 | 399  | 2015 |                    | <i>erm(T)</i>        |               |
| SAMN07154082 | 77 | 63   | 2015 |                    |                      | <i>tet(O)</i> |
| SAMN07154113 | 77 | 63   | 2015 |                    | <i>erm(A)</i>        | <i>tet(O)</i> |
| SAMN07154218 | 77 | 63   | 2015 |                    | <i>erm(A)</i>        | <i>tet(O)</i> |
| SAMN07154424 | 77 | 133  | 2015 |                    |                      | <i>tet(M)</i> |
| SAMN07154088 | 77 | 63   | 2015 |                    | <i>erm(T)</i>        | <i>tet(O)</i> |
| SAMN07154039 | 77 | 904  | 2015 |                    |                      | <i>tet(M)</i> |
| SAMN07154123 | 77 | 399  | 2015 |                    |                      | <i>tet(M)</i> |
| SAMN07154233 | 77 | 133  | 2015 |                    |                      | <i>tet(M)</i> |
| SAMN07154254 | 77 | 63   | 2015 |                    | <i>erm(A)</i>        | <i>tet(O)</i> |
| SAMN07154320 | 77 | 63   | 2015 |                    |                      | <i>tet(O)</i> |
| SAMN07153667 | 77 | 63   | 2015 |                    | <i>erm(A)</i>        | <i>tet(O)</i> |
| SAMN07153577 | 77 | 133  | 2015 |                    |                      | <i>tet(M)</i> |
| SAMN07153486 | 77 | 63   | 2015 |                    |                      | <i>tet(O)</i> |
| SAMN07153786 | 77 | 399  | 2015 |                    |                      | <i>tet(M)</i> |
| SAMN07153749 | 77 | 63   | 2015 |                    |                      | <i>tet(O)</i> |
| SAMN07153965 | 77 | 63   | 2015 |                    | <i>erm(A)</i>        | <i>tet(O)</i> |
| SAMN07153655 | 77 | 63   | 2015 |                    | <i>erm(A)</i>        | <i>tet(O)</i> |
| SAMN07153820 | 77 | 399  | 2015 | <i>aph(3')-III</i> | <i>erm(B)</i>        | <i>tet(M)</i> |
| SAMN07153927 | 77 | 63   | 2015 |                    | <i>erm(A)</i>        | <i>tet(O)</i> |
| SAMN07153572 | 77 | 133  | 2015 |                    |                      | <i>tet(M)</i> |
| SAMN07153571 | 77 | 133  | 2015 |                    |                      | <i>tet(M)</i> |
| SAMN07153570 | 77 | 63   | 2015 |                    | <i>erm(A)</i>        | <i>tet(O)</i> |
| SAMN07153726 | 77 | 399  | 2015 |                    | <i>erm(T)</i>        | <i>tet(M)</i> |
| SAMN07153733 | 77 | 399  | 2015 | <i>aph(3')-III</i> | <i>erm(B)</i>        | <i>tet(M)</i> |
| SAMN07153898 | 77 | 63   | 2015 |                    | <i>erm(A)</i>        | <i>tet(O)</i> |
| SAMN07153692 | 77 | 63   | 2015 |                    |                      | <i>tet(O)</i> |
| SAMN07153652 | 77 | 399  | 2015 |                    | <i>erm(T)</i>        | <i>tet(M)</i> |
| SAMN07153940 | 77 | 63   | 2015 |                    |                      | <i>tet(O)</i> |
| SAMN07153812 | 77 | 63   | 2015 |                    | <i>erm(A)</i>        | <i>tet(O)</i> |
| SAMN07153516 | 77 | 63   | 2015 |                    | <i>erm(A)</i>        | <i>tet(O)</i> |
| SAMN07153640 | 77 | 63   | 2015 |                    | <i>erm(A)</i>        | <i>tet(O)</i> |
| SAMN07153735 | 77 | 63   | 2015 |                    |                      |               |
| SAMN07153868 | 77 | 63   | 2015 |                    | <i>erm(A)</i>        | <i>tet(O)</i> |

|              |    |     |      |  |        |        |
|--------------|----|-----|------|--|--------|--------|
| SAMN07153685 | 77 | 63  | 2015 |  |        | tet(O) |
| SAMN07153629 | 77 | 63  | 2015 |  |        | tet(O) |
| SAMN07153628 | 77 | 63  | 2015 |  |        | tet(O) |
| SAMN07153328 | 77 | 63  | 2015 |  | erm(A) | tet(O) |
| SAMN07153442 | 77 | 63  | 2015 |  |        | tet(O) |
| SAMN07153145 | 77 | 399 | 2015 |  | erm(T) | tet(M) |
| SAMN07153148 | 77 | 399 | 2015 |  | erm(T) | tet(M) |
| SAMN07153390 | 77 | 63  | 2015 |  |        | tet(O) |
| SAMN07153457 | 77 | 63  | 2015 |  |        | tet(O) |
| SAMN07153269 | 77 | 63  | 2015 |  |        | tet(O) |
| SAMN07153359 | 77 | 399 | 2015 |  | erm(T) | tet(M) |
| SAMN07153235 | 77 | 63  | 2015 |  | erm(A) | tet(O) |
| SAMN07153452 | 77 | 63  | 2015 |  |        | tet(O) |
| SAMN07153009 | 77 | 63  | 2015 |  |        |        |
| SAMN08690618 | 77 | 63  | 2016 |  | erm(A) | tet(O) |
| SAMN08691506 | 77 | 63  | 2016 |  | erm(A) | tet(O) |
| SAMN08690566 | 77 | 399 | 2016 |  | erm(T) |        |
| SAMN08691225 | 77 | 63  | 2016 |  |        | tet(O) |
| SAMN08691218 | 77 | 63  | 2016 |  |        | tet(O) |
| SAMN08690856 | 77 | 63  | 2016 |  | erm(A) | tet(O) |
| SAMN08690920 | 77 | 63  | 2016 |  | erm(A) | tet(O) |
| SAMN08691409 | 77 | 63  | 2016 |  | erm(A) | tet(O) |
| SAMN08690664 | 77 | 133 | 2016 |  |        | tet(M) |
| SAMN08691372 | 77 | 399 | 2016 |  | erm(T) | tet(M) |
| SAMN08691385 | 77 | 63  | 2016 |  | erm(T) | tet(O) |
| SAMN08691404 | 77 | 63  | 2016 |  |        | tet(O) |
| SAMN08691178 | 77 | 63  | 2016 |  |        |        |
| SAMN08691185 | 77 | 63  | 2016 |  |        | tet(O) |
| SAMN08690582 | 77 | 63  | 2016 |  |        | tet(O) |
| SAMN08691336 | 77 | 63  | 2016 |  | erm(A) | tet(O) |
| SAMN08691484 | 77 | 63  | 2016 |  | erm(A) | tet(O) |
| SAMN08690906 | 77 | 63  | 2016 |  | erm(A) | tet(O) |
| SAMN08690852 | 77 | 63  | 2016 |  | erm(A) | tet(O) |
| SAMN08691216 | 77 | 63  | 2016 |  |        | tet(O) |
| SAMN08690872 | 77 | 63  | 2016 |  |        |        |
| SAMN08691356 | 77 | 63  | 2016 |  |        | tet(O) |
| SAMN08691490 | 77 | 133 | 2016 |  |        | tet(M) |
| SAMN08691273 | 77 | 399 | 2016 |  | erm(T) | tet(M) |
| SAMN08690710 | 77 | 63  | 2016 |  | erm(A) | tet(O) |
| SAMN08691138 | 77 | 63  | 2016 |  |        | tet(O) |
| SAMN08692510 | 77 | 63  | 2017 |  |        | tet(O) |
| SAMN08691588 | 77 | 63  | 2016 |  |        | tet(O) |
| SAMN08692230 | 77 | 399 | 2017 |  |        | tet(M) |
| SAMN08692460 | 77 | 63  | 2017 |  |        | tet(O) |
| SAMN08691885 | 77 | 63  | 2016 |  |        | tet(O) |
| SAMN08691891 | 77 | 63  | 2016 |  | erm(A) | tet(O) |
| SAMN08691893 | 77 | 63  | 2016 |  |        | tet(O) |
| SAMN08692080 | 77 | 399 | 2016 |  | erm(T) | tet(M) |
| SAMN08692076 | 77 | 399 | 2016 |  |        | tet(M) |
| SAMN08691712 | 77 | 63  | 2016 |  |        | tet(O) |
| SAMN08691705 | 77 | 63  | 2016 |  | erm(A) | tet(O) |
| SAMN08691709 | 77 | 63  | 2016 |  | erm(A) | tet(O) |
| SAMN08692158 | 77 | 63  | 2017 |  |        | tet(O) |
| SAMN08692163 | 77 | 63  | 2017 |  |        | tet(O) |
| SAMN08692237 | 77 | 63  | 2017 |  | erm(A) | tet(O) |
| SAMN08692094 | 77 | 399 | 2016 |  | erm(T) | tet(M) |
| SAMN08691701 | 77 | 63  | 2016 |  | erm(A) | tet(O) |
| SAMN08691533 | 77 | 399 | 2016 |  | erm(T) | tet(M) |
| SAMN08691929 | 77 | 63  | 2016 |  | erm(A) | tet(O) |
| SAMN08691903 | 77 | 63  | 2016 |  |        | tet(O) |
| SAMN08692409 | 77 | 399 | 2017 |  |        | tet(M) |
| SAMN08692280 | 77 | 399 | 2017 |  | erm(T) | tet(M) |
| SAMN08691721 | 77 | 133 | 2016 |  |        | tet(M) |
| SAMN08691755 | 77 | 399 | 2016 |  |        | tet(M) |
| SAMN08691757 | 77 | 399 | 2016 |  |        | tet(M) |
| SAMN08691967 | 77 | 63  | 2016 |  |        | tet(O) |

|              |    |     |      |                  |               |               |
|--------------|----|-----|------|------------------|---------------|---------------|
| SAMN08691664 | 77 | 63  | 2016 |                  | <i>erm(A)</i> | <i>tet(O)</i> |
| SAMN08691670 | 77 | 63  | 2016 |                  | <i>erm(A)</i> | <i>tet(O)</i> |
| SAMN08692352 | 77 | 63  | 2016 |                  | <i>erm(A)</i> | <i>tet(O)</i> |
| SAMN08692006 | 77 | 63  | 2016 |                  |               | <i>tet(O)</i> |
| SAMN08692143 | 77 | 63  | 2016 |                  |               | <i>tet(O)</i> |
| SAMN08692481 | 77 | 63  | 2017 |                  |               | <i>tet(O)</i> |
| SAMN08691994 | 77 | 63  | 2016 |                  | <i>erm(A)</i> | <i>tet(O)</i> |
| SAMN08691922 | 77 | 63  | 2016 |                  |               |               |
| SAMN08692309 | 77 | 63  | 2017 |                  | <i>erm(A)</i> | <i>tet(O)</i> |
| SAMN08692449 | 77 | 63  | 2017 |                  |               | <i>tet(O)</i> |
| SAMN08692445 | 77 | 63  | 2017 |                  |               | <i>tet(O)</i> |
| SAMN08692035 | 77 | 63  | 2017 |                  |               | <i>tet(O)</i> |
| SAMN08692130 | 77 | 399 | 2016 |                  | <i>erm(T)</i> | <i>tet(M)</i> |
| SAMN08691736 | 77 | 482 | 2016 |                  |               | <i>tet(M)</i> |
| SAMN08691985 | 77 | 63  | 2016 |                  | <i>erm(A)</i> | <i>tet(O)</i> |
| SAMN08692068 | 77 | 399 | 2016 |                  |               | <i>tet(M)</i> |
| SAMN08691564 | 77 | 399 | 2016 |                  | <i>erm(T)</i> | <i>tet(M)</i> |
| SAMN08691560 | 77 | 63  | 2016 |                  |               | <i>tet(O)</i> |
| SAMN08692493 | 77 | 63  | 2017 |                  |               | <i>tet(O)</i> |
| SAMN08692566 | 77 | 63  | 2017 |                  |               |               |
| SAMN08692683 | 77 | 399 | 2017 |                  | <i>erm(T)</i> | <i>tet(M)</i> |
| SAMN08692697 | 77 | 399 | 2017 |                  |               | <i>tet(M)</i> |
| SAMN08692802 | 77 | 63  | 2017 |                  | <i>erm(A)</i> | <i>tet(O)</i> |
| SAMN08692726 | 77 | 63  | 2016 |                  |               | <i>tet(O)</i> |
| SAMN08692571 | 77 | 63  | 2017 |                  | <i>erm(A)</i> | <i>tet(O)</i> |
| SAMN08692574 | 77 | 63  | 2017 |                  |               |               |
| SAMN08693268 | 77 | 63  | 2017 |                  | <i>erm(A)</i> | <i>tet(O)</i> |
| SAMN08693112 | 77 | 63  | 2017 |                  |               | <i>tet(M)</i> |
| SAMN08693110 | 77 | 63  | 2017 |                  | <i>erm(A)</i> | <i>tet(O)</i> |
| SAMN08693044 | 77 | 399 | 2017 |                  |               | <i>tet(M)</i> |
| SAMN08693002 | 77 | 63  | 2017 |                  | <i>erm(A)</i> | <i>tet(O)</i> |
| SAMN08693005 | 77 | 63  | 2017 |                  | <i>erm(A)</i> | <i>tet(O)</i> |
| SAMN08692886 | 77 | 63  | 2017 |                  | <i>erm(A)</i> | <i>tet(O)</i> |
| SAMN08693056 | 77 | 399 | 2017 |                  |               | <i>tet(M)</i> |
| SAMN08693057 | 77 | 63  | 2017 |                  | <i>erm(A)</i> | <i>tet(O)</i> |
| SAMN08693129 | 77 | 63  | 2017 |                  | <i>erm(A)</i> | <i>tet(O)</i> |
| SAMN08693126 | 77 | 63  | 2017 |                  |               | <i>tet(O)</i> |
| SAMN08692995 | 77 | 63  | 2017 |                  | <i>erm(A)</i> | <i>tet(O)</i> |
| SAMN08693227 | 77 | 63  | 2016 |                  |               | <i>tet(O)</i> |
| SAMN08692867 | 77 | 63  | 2017 |                  |               | <i>tet(O)</i> |
| SAMN08693062 | 77 | 63  | 2017 |                  | <i>erm(A)</i> | <i>tet(O)</i> |
| SAMN08693103 | 77 | 63  | 2017 |                  |               | <i>tet(O)</i> |
| SAMN08693204 | 77 | 63  | 2017 |                  |               | <i>tet(O)</i> |
| SAMN09849186 | 77 | 399 | 2017 |                  | <i>erm(T)</i> | <i>tet(M)</i> |
| SAMN09849869 | 77 | 63  | 2017 |                  |               | <i>tet(O)</i> |
| SAMN09849871 | 77 | 63  | 2017 |                  | <i>erm(A)</i> | <i>tet(O)</i> |
| SAMN09849787 | 77 | 63  | 2017 |                  |               | <i>tet(O)</i> |
| SAMN09849444 | 77 | 399 | 2017 |                  |               | <i>tet(M)</i> |
| SAMN09849441 | 77 | 63  | 2017 | <i>ant(6)-la</i> | <i>erm(A)</i> | <i>tet(O)</i> |
| SAMN09848975 | 77 | 63  | 2017 |                  |               | <i>tet(O)</i> |
| SAMN09849313 | 77 | 63  | 2017 |                  |               | <i>tet(O)</i> |
| SAMN09849163 | 77 | 63  | 2017 | <i>ant(6)-la</i> | <i>erm(A)</i> | <i>tet(O)</i> |
| SAMN09849162 | 77 | 63  | 2017 |                  | <i>erm(A)</i> | <i>tet(O)</i> |
| SAMN09849609 | 77 | 399 | 2017 |                  | <i>erm(T)</i> |               |
| SAMN09849207 | 77 | 63  | 2017 |                  | <i>erm(A)</i> | <i>tet(O)</i> |
| SAMN09849481 | 77 | 399 | 2017 |                  |               | <i>tet(M)</i> |
| SAMN09849677 | 77 | 399 | 2017 |                  | <i>erm(T)</i> | <i>tet(M)</i> |
| SAMN09849878 | 77 | 63  | 2017 |                  |               | <i>tet(O)</i> |
| SAMN09848992 | 77 | 399 | 2016 |                  | <i>erm(T)</i> | <i>tet(M)</i> |
| SAMN09849523 | 77 | 63  | 2017 |                  | <i>erm(A)</i> | <i>tet(O)</i> |
| SAMN09848926 | 77 | 399 | 2016 |                  | <i>erm(T)</i> | <i>tet(M)</i> |
| SAMN09849335 | 77 | 63  | 2017 |                  | <i>erm(A)</i> | <i>tet(O)</i> |
| SAMN09849644 | 77 | 63  | 2017 |                  | <i>erm(A)</i> | <i>tet(O)</i> |
| SAMN09849693 | 77 | 63  | 2017 |                  | <i>erm(A)</i> | <i>tet(O)</i> |
| SAMN09849349 | 77 | 63  | 2017 |                  | <i>erm(A)</i> | <i>tet(O)</i> |
| SAMN09849472 | 77 | 63  | 2017 |                  | <i>erm(A)</i> | <i>tet(O)</i> |

|              |    |     |      |                        |                |        |
|--------------|----|-----|------|------------------------|----------------|--------|
| SAMN09849666 | 77 | 63  | 2017 |                        | erm(A)         | tet(O) |
| SAMN09849672 | 77 | 399 | 2017 |                        |                | tet(M) |
| SAMN09848924 | 77 | 63  | 2016 |                        |                | tet(O) |
| SAMN09849067 | 77 | 63  | 2017 |                        | erm(A)         | tet(O) |
| SAMN09849402 | 77 | 63  | 2017 |                        | erm(A)         | tet(O) |
| SAMN09849284 | 77 | 63  | 2017 |                        |                | tet(O) |
| SAMN09849291 | 77 | 63  | 2017 |                        | erm(A)         | tet(O) |
| SAMN09849288 | 77 | 63  | 2017 |                        |                | tet(O) |
| SAMN09849359 | 77 | 63  | 2017 |                        | erm(A)         | tet(O) |
| SAMN09849362 | 77 | 63  | 2017 |                        | erm(A)         | tet(O) |
| SAMN09849262 | 77 | 63  | 2017 |                        |                | tet(O) |
| SAMN09849624 | 77 | 63  | 2017 |                        |                | tet(O) |
| SAMN09849390 | 77 | 63  | 2017 |                        | erm(A)         | tet(O) |
| SAMN09849038 | 77 | 63  | 2017 |                        | erm(A)         | tet(O) |
| SAMN09849041 | 77 | 63  | 2017 |                        |                | tet(O) |
| SAMN09849211 | 77 | 63  | 2017 |                        |                |        |
| SAMN09849769 | 77 | 63  | 2017 |                        |                | tet(O) |
| SAMN07154285 | 92 | 82  | 2015 | ant(6)-Ia, aph(3')-III | erm(T)         | tet(M) |
| SAMN07154361 | 92 | 82  | 2015 | ant(6)-Ia, aph(3')-III | erm(T)         | tet(M) |
| SAMN07154390 | 92 | 82  | 2015 | ant(6)-Ia, aph(3')-III | erm(T)         | tet(M) |
| SAMN07154077 | 92 | 82  | 2015 | ant(6)-Ia, aph(3')-III | erm(T)         | tet(M) |
| SAMN07154079 | 92 | 82  | 2015 | ant(6)-Ia, aph(3')-III | erm(T)         | tet(M) |
| SAMN07154332 | 92 | 82  | 2015 | ant(6)-Ia, aph(3')-III | erm(T)         | tet(M) |
| SAMN07154330 | 92 | 82  | 2015 | ant(6)-Ia, aph(3')-III | erm(T)         | tet(M) |
| SAMN07154114 | 92 | 82  | 2015 | ant(6)-Ia, aph(3')-III | erm(T)         | tet(M) |
| SAMN07154214 | 92 | 82  | 2015 | ant(6)-Ia, aph(3')-III | erm(A)         | tet(M) |
| SAMN07154264 | 92 | 82  | 2015 | ant(6)-Ia, aph(3')-III | erm(T)         | tet(M) |
| SAMN07154265 | 92 | 82  | 2015 | ant(6)-Ia, aph(3')-III | erm(T)         | tet(M) |
| SAMN07154087 | 92 | 82  | 2015 | ant(6)-Ia, aph(3')-III | erm(T)         | tet(M) |
| SAMN07154091 | 92 | 82  | 2015 | ant(6)-Ia, aph(3')-III | erm(T)         | tet(M) |
| SAMN07154040 | 92 | 82  | 2015 | ant(6)-Ia, aph(3')-III |                | tet(M) |
| SAMN07154247 | 92 | 82  | 2015 | ant(6)-Ia, aph(3')-III | erm(T)         | tet(M) |
| SAMN07154252 | 92 | 82  | 2015 | ant(6)-Ia, aph(3')-III | erm(T)         | tet(M) |
| SAMN07154096 | 92 | 82  | 2015 | ant(6)-Ia, aph(3')-III | erm(T)         | tet(M) |
| SAMN07154262 | 92 | 82  | 2015 | ant(6)-Ia, aph(3')-III | erm(T)         | tet(M) |
| SAMN07154275 | 92 | 82  | 2015 | ant(6)-Ia, aph(3')-III |                | tet(M) |
| SAMN07154024 | 92 | 82  | 2015 | ant(6)-Ia, aph(3')-III | erm(T)         | tet(M) |
| SAMN07154027 | 92 | 82  | 2015 | ant(6)-Ia, aph(3')-III | erm(T)         | tet(M) |
| SAMN07154235 | 92 | 82  | 2015 | ant(6)-Ia, aph(3')-III | erm(T)         | tet(M) |
| SAMN07153979 | 92 | 82  | 2015 | ant(6)-Ia, aph(3')-III | erm(T)         | tet(M) |
| SAMN07154104 | 92 | 82  | 2015 | ant(6)-Ia, aph(3')-III | erm(T)         | tet(M) |
| SAMN07153881 | 92 | 82  | 2015 | ant(6)-Ia, aph(3')-III | erm(T)         | tet(M) |
| SAMN07153785 | 92 | 82  | 2015 | ant(6)-Ia, aph(3')-III | erm(T)         | tet(M) |
| SAMN07153721 | 92 | 82  | 2015 | ant(6)-Ia, aph(3')-III | erm(T)         | tet(M) |
| SAMN07153718 | 92 | 82  | 2015 | ant(6)-Ia, aph(3')-III |                | tet(M) |
| SAMN07153892 | 92 | 82  | 2015 | ant(6)-Ia, aph(3')-III | erm(T)         | tet(M) |
| SAMN07153886 | 92 | 82  | 2015 | ant(6)-Ia, aph(3')-III | erm(T)         | tet(M) |
| SAMN07153750 | 92 | 82  | 2015 |                        |                |        |
| SAMN07153777 | 92 | 82  | 2015 | ant(6)-Ia, aph(3')-III | erm(T)         | tet(M) |
| SAMN07153896 | 92 | 82  | 2015 | ant(6)-Ia, aph(3')-III | erm(T)         | tet(M) |
| SAMN07153805 | 92 | 82  | 2015 | ant(6)-Ia, aph(3')-III | erm(T)         | tet(M) |
| SAMN07153765 | 92 | 82  | 2015 | ant(6)-Ia, aph(3')-III | erm(T)         | tet(M) |
| SAMN07153764 | 92 | 82  | 2015 | ant(6)-Ia, aph(3')-III | erm(T)         | tet(M) |
| SAMN07153737 | 92 | 82  | 2015 | ant(6)-Ia, aph(3')-III | erm(T)         | tet(M) |
| SAMN07153549 | 92 | 82  | 2015 | ant(6)-Ia, aph(3')-III | erm(T)         | tet(M) |
| SAMN07153942 | 92 | 82  | 2015 | ant(6)-Ia, aph(3')-III | erm(T)         | tet(M) |
| SAMN07153801 | 92 | 82  | 2015 | ant(6)-Ia, aph(3')-III | erm(A), erm(T) | tet(M) |
| SAMN07153955 | 92 | 82  | 2015 | ant(6)-Ia, aph(3')-III | erm(T)         | tet(M) |
| SAMN07153953 | 92 | 82  | 2015 | ant(6)-Ia, aph(3')-III | erm(T)         | tet(M) |
| SAMN07153954 | 92 | 82  | 2015 | ant(6)-Ia, aph(3')-III | erm(T)         | tet(M) |
| SAMN07153192 | 92 | 82  | 2015 | ant(6)-Ia, aph(3')-III | erm(T)         | tet(M) |
| SAMN07153226 | 92 | 82  | 2015 | ant(6)-Ia, aph(3')-III | erm(T)         | tet(M) |
| SAMN07153228 | 92 | 82  | 2015 | ant(6)-Ia, aph(3')-III | erm(T)         | tet(M) |
| SAMN07153407 | 92 | 82  | 2015 | ant(6)-Ia, aph(3')-III | erm(T)         | tet(M) |
| SAMN07153245 | 92 | 855 | 2015 | ant(6)-Ia, aph(3')-III | erm(T)         | tet(M) |
| SAMN07153387 | 92 | 82  | 2015 | ant(6)-Ia, aph(3')-III | erm(T)         | tet(M) |





|              |    |    |      |                               |               |               |
|--------------|----|----|------|-------------------------------|---------------|---------------|
| SAMN09849342 | 92 | 82 | 2017 | <i>ant(6)-Ia, aph(3')-III</i> | <i>erm(T)</i> | <i>tet(M)</i> |
| SAMN09849339 | 92 | 82 | 2017 | <i>ant(6)-Ia, aph(3')-III</i> | <i>erm(T)</i> | <i>tet(M)</i> |
| SAMN09849336 | 92 | 82 | 2017 | <i>ant(6)-Ia, aph(3')-III</i> | <i>erm(T)</i> | <i>tet(M)</i> |
| SAMN09849842 | 92 | 82 | 2017 | <i>ant(6)-Ia, aph(3')-III</i> | <i>erm(T)</i> | <i>tet(M)</i> |
| SAMN09849050 | 92 | 82 | 2017 | <i>ant(6)-Ia, aph(3')-III</i> | <i>erm(T)</i> | <i>tet(M)</i> |
| SAMN09848968 | 92 | 82 | 2016 | <i>ant(6)-Ia, aph(3')-III</i> | <i>erm(T)</i> | <i>tet(M)</i> |
| SAMN09849352 | 92 | 82 | 2017 | <i>ant(6)-Ia, aph(3')-III</i> | <i>erm(T)</i> | <i>tet(M)</i> |
| SAMN09849345 | 92 | 82 | 2017 |                               | <i>erm(A)</i> |               |
| SAMN09849353 | 92 | 82 | 2017 | <i>ant(6)-Ia, aph(3')-III</i> | <i>erm(T)</i> | <i>tet(M)</i> |
| SAMN09849566 | 92 | 82 | 2017 | <i>ant(6)-Ia, aph(3')-III</i> | <i>erm(T)</i> | <i>tet(M)</i> |
| SAMN09849670 | 92 | 82 | 2017 | <i>ant(6)-Ia, aph(3')-III</i> | <i>erm(T)</i> | <i>tet(M)</i> |
| SAMN09849326 | 92 | 82 | 2017 | <i>ant(6)-Ia, aph(3')-III</i> | <i>erm(T)</i> | <i>tet(M)</i> |
| SAMN09849330 | 92 | 82 | 2017 | <i>ant(6)-Ia, aph(3')-III</i> | <i>erm(T)</i> | <i>tet(M)</i> |
| SAMN09849334 | 92 | 82 | 2017 | <i>ant(6)-Ia, aph(3')-III</i> | <i>erm(T)</i> | <i>tet(M)</i> |
| SAMN09849095 | 92 | 82 | 2017 | <i>ant(6)-Ia, aph(3')-III</i> | <i>erm(T)</i> | <i>tet(M)</i> |
| SAMN09849100 | 92 | 82 | 2017 | <i>ant(6)-Ia, aph(3')-III</i> | <i>erm(T)</i> | <i>tet(M)</i> |
| SAMN09849101 | 92 | 82 | 2017 | <i>ant(6)-Ia, aph(3')-III</i> | <i>erm(T)</i> | <i>tet(M)</i> |
| SAMN09849103 | 92 | 82 | 2017 | <i>ant(6)-Ia, aph(3')-III</i> | <i>erm(T)</i> | <i>tet(M)</i> |
| SAMN09849104 | 92 | 82 | 2017 | <i>ant(6)-Ia, aph(3')-III</i> | <i>erm(T)</i> | <i>tet(M)</i> |
| SAMN09849417 | 92 | 82 | 2017 | <i>ant(6)-Ia, aph(3')-III</i> | <i>erm(T)</i> | <i>tet(M)</i> |
| SAMN09849418 | 92 | 82 | 2017 | <i>ant(6)-Ia, aph(3')-III</i> | <i>erm(T)</i> | <i>tet(M)</i> |
| SAMN09849069 | 92 | 82 | 2017 | <i>ant(6)-Ia, aph(3')-III</i> | <i>erm(T)</i> | <i>tet(M)</i> |
| SAMN09849890 | 92 | 82 | 2017 | <i>ant(6)-Ia, aph(3')-III</i> | <i>erm(T)</i> | <i>tet(M)</i> |
| SAMN09849248 | 92 | 82 | 2017 | <i>ant(6)-Ia, aph(3')-III</i> | <i>erm(T)</i> | <i>tet(M)</i> |
| SAMN09849247 | 92 | 82 | 2017 | <i>ant(6)-Ia, aph(3')-III</i> | <i>erm(T)</i> | <i>tet(M)</i> |
| SAMN09849809 | 92 | 82 | 2017 | <i>ant(6)-Ia, aph(3')-III</i> | <i>erm(T)</i> | <i>tet(M)</i> |
| SAMN09849059 | 92 | 82 | 2017 |                               | <i>erm(A)</i> |               |
| SAMN09849058 | 92 | 82 | 2017 | <i>ant(6)-Ia, aph(3')-III</i> | <i>erm(T)</i> | <i>tet(M)</i> |
| SAMN09848960 | 92 | 82 | 2016 | <i>ant(6)-Ia, aph(3')-III</i> | <i>erm(T)</i> | <i>tet(M)</i> |
| SAMN09849564 | 92 | 82 | 2017 | <i>ant(6)-Ia, aph(3')-III</i> | <i>erm(T)</i> | <i>tet(M)</i> |
| SAMN09849563 | 92 | 82 | 2017 | <i>ant(6)-Ia, aph(3')-III</i> | <i>erm(T)</i> | <i>tet(M)</i> |
| SAMN09849851 | 92 | 82 | 2017 | <i>ant(6)-Ia, aph(3')-III</i> | <i>erm(T)</i> | <i>tet(M)</i> |
| SAMN09849106 | 92 | 82 | 2017 | <i>ant(6)-Ia, aph(3')-III</i> | <i>erm(T)</i> | <i>tet(M)</i> |
| SAMN09849108 | 92 | 82 | 2017 | <i>ant(6)-Ia, aph(3')-III</i> | <i>erm(T)</i> | <i>tet(M)</i> |
| SAMN09849083 | 92 | 82 | 2017 | <i>ant(6)-Ia, aph(3')-III</i> | <i>erm(T)</i> | <i>tet(M)</i> |
| SAMN09849129 | 92 | 82 | 2017 | <i>ant(6)-Ia, aph(3')-III</i> | <i>erm(T)</i> | <i>tet(M)</i> |
| SAMN09849598 | 92 | 82 | 2017 | <i>ant(6)-Ia, aph(3')-III</i> | <i>erm(T)</i> | <i>tet(M)</i> |
| SAMN09849197 | 92 | 82 | 2017 | <i>ant(6)-Ia, aph(3')-III</i> | <i>erm(T)</i> | <i>tet(M)</i> |
| SAMN09849255 | 92 | 82 | 2017 | <i>ant(6)-Ia, aph(3')-III</i> | <i>erm(T)</i> | <i>tet(M)</i> |
| SAMN09849817 | 92 | 82 | 2017 | <i>ant(6)-Ia, aph(3')-III</i> | <i>erm(T)</i> | <i>tet(M)</i> |
| SAMN09849820 | 92 | 82 | 2017 | <i>ant(6)-Ia, aph(3')-III</i> | <i>erm(T)</i> | <i>tet(M)</i> |
| SAMN09849638 | 92 | 82 | 2017 | <i>ant(6)-Ia, aph(3')-III</i> | <i>erm(T)</i> | <i>tet(M)</i> |
| SAMN09849814 | 92 | 82 | 2017 | <i>ant(6)-Ia, aph(3')-III</i> | <i>erm(T)</i> | <i>tet(M)</i> |
| SAMN09849430 | 92 | 82 | 2017 | <i>ant(6)-Ia, aph(3')-III</i> | <i>erm(T)</i> | <i>tet(M)</i> |
| SAMN09849393 | 92 | 82 | 2017 | <i>ant(6)-Ia, aph(3')-III</i> | <i>erm(T)</i> | <i>tet(M)</i> |
| SAMN09849426 | 92 | 82 | 2017 | <i>ant(6)-Ia, aph(3')-III</i> | <i>erm(T)</i> | <i>tet(M)</i> |
| SAMN09849428 | 92 | 82 | 2017 | <i>ant(6)-Ia, aph(3')-III</i> | <i>erm(T)</i> | <i>tet(M)</i> |
| SAMN09849427 | 92 | 82 | 2017 | <i>ant(6)-Ia, aph(3')-III</i> | <i>erm(T)</i> | <i>tet(M)</i> |
| SAMN09849214 | 92 | 82 | 2017 | <i>ant(6)-Ia, aph(3')-III</i> | <i>erm(T)</i> | <i>tet(M)</i> |
| SAMN09848967 | 92 | 82 | 2016 | <i>ant(6)-Ia, aph(3')-III</i> | <i>erm(T)</i> | <i>tet(M)</i> |
| SAMN09849316 | 92 | 82 | 2017 | <i>ant(6)-Ia, aph(3')-III</i> | <i>erm(T)</i> | <i>tet(M)</i> |
| SAMN09849319 | 92 | 82 | 2017 | <i>ant(6)-Ia, aph(3')-III</i> | <i>erm(T)</i> | <i>tet(M)</i> |
| SAMN09849804 | 92 | 82 | 2017 | <i>ant(6)-Ia, aph(3')-III</i> | <i>erm(T)</i> | <i>tet(M)</i> |
| SAMN09849770 | 92 | 82 | 2017 | <i>ant(6)-Ia, aph(3')-III</i> | <i>erm(T)</i> | <i>tet(M)</i> |
| SAMN09849772 | 92 | 82 | 2017 | <i>ant(6)-Ia, aph(3')-III</i> | <i>erm(T)</i> | <i>tet(M)</i> |
| SAMN09849573 | 92 | 82 | 2017 | <i>ant(6)-Ia, aph(3')-III</i> | <i>erm(T)</i> | <i>tet(M)</i> |
| SAMN09849852 | 92 | 82 | 2017 | <i>ant(6)-Ia, aph(3')-III</i> | <i>erm(T)</i> | <i>tet(M)</i> |
| SAMN09849574 | 92 | 82 | 2017 | <i>ant(6)-Ia, aph(3')-III</i> | <i>erm(T)</i> | <i>tet(M)</i> |

47

48 <sup>a</sup> Biosample number under BioProject PRJNA395240.

49 <sup>b</sup> GAS *erm* type determined as described in Methods.

50 <sup>c</sup> Sequence type (ST) determined as described in Methods.

51 <sup>d</sup> Year of isolation. Strains after 2015 are currently unpublished (B. Beall personal  
52 communication).

53 <sup>e</sup> Antibiotic resistance genes identified through bioinformatics pipeline defined in Methods for  
54 aminoglycosides (AG), macrolide-lincosamide-streptogramin (MLS), tetracycline (TET).

55



56 TABLE S3. PHE GAS strains used in this study.

57

| Run Accession <sup>a</sup> | Emm <sup>b</sup> | ST <sup>c</sup> | Year <sup>d</sup> | AG <sup>e</sup> | MLS           | TET           |
|----------------------------|------------------|-----------------|-------------------|-----------------|---------------|---------------|
| SAMEA3930755               | 75               | 150             | 2014              |                 |               |               |
| SAMEA3930594               | 75               | 150             | 2014              |                 |               |               |
| SAMEA3931077               | 75               | 150             | 2014              |                 |               |               |
| SAMEA3930576               | 75               | 150             | 2014              |                 |               |               |
| SAMEA3930750               | 75               | 150             | 2014              |                 |               |               |
| SAMEA3930876               | 75               | 150             | 2014              |                 |               |               |
| SAMEA3930769               | 75               | 150             | 2014              |                 |               |               |
| SAMEA3931126               | 75               | 150             | 2014              |                 |               |               |
| SAMEA3930802               | 75               | 150             | 2014              |                 |               |               |
| SAMEA3931085               | 75               | 150             | 2014              |                 |               |               |
| SAMEA3930746               | 75               | 150             | 2014              |                 |               |               |
| SAMEA3930874               | 75               | 150             | 2014              |                 |               |               |
| SAMEA3930785               | 75               | 150             | 2014              |                 |               |               |
| SAMEA3930936               | 75               | 150             | 2014              |                 |               |               |
| SAMEA3931116               | 75               | 150             | 2014              |                 |               |               |
| SAMEA3930981               | 75               | 150             | 2014              |                 |               |               |
| SAMEA3930863               | 75               | 150             | 2014              |                 |               |               |
| SAMEA3930749               | 77               | 399             | 2014              |                 |               | <i>tet(M)</i> |
| SAMEA3930908               | 77               | 63              | 2014              |                 | <i>erm(A)</i> | <i>tet(O)</i> |
| SAMEA3931070               | 77               | 63              | 2014              |                 | <i>erm(A)</i> | <i>tet(O)</i> |

58

59 <sup>a</sup> Biosample number under BioProject PRJEB13551.

60 <sup>b</sup> GAS *emm* type determined as described in Methods.

61 <sup>c</sup> Sequence type (ST) determined as described in Methods.

62 <sup>d</sup> Year of isolation.

63 <sup>e</sup> Antibiotic resistance genes identified through bioinformatics pipeline defined in Methods for

64 aminoglycosides (AG), macrolide-lincosamide-streptogramin (MLS), tetracycline (TET).

65

66 TABLE S4. GAS *emm* types defined by high (>50%) and low intrinsic resistance.

67

| <i>emm</i>     | Invasive Index <sup>a</sup> | Total (%) (n=929) | Any Resistance (%) <sup>b</sup> | O/E <sup>c</sup> (Any) | TE Resistance (%) | O/E (TE)      | M/MLS Resistance (%) | O/E (M/MLS)   |
|----------------|-----------------------------|-------------------|---------------------------------|------------------------|-------------------|---------------|----------------------|---------------|
| <b>Low</b>     |                             |                   |                                 |                        |                   |               |                      |               |
| 1              | 1.41                        | 199 (21.4)        | 1 (0.5)                         | 0.09                   | 1 (0.5)           | 0.09          | 1 (0.5)              | 0.07          |
| 2              | 0.41                        | 11 (1.2)          | 0 (0.0)                         | -                      | -                 | -             | -                    | -             |
| 3              | 1.85                        | 76 (8.2)          | 2 (2.6)                         | 0.24                   | 1 (1.3)           | 0.24          | 2 (2.6)              | 0.38          |
| 4              | 0.37                        | 86 (9.3)          | 3 (3.5)                         | 0.32                   | -                 | -             | 3 (3.5)              | 0.50          |
| 6              | 0.60                        | 71 (7.6)          | 2 (2.8)                         | 0.26                   | 1 (1.4)           | 0.25          | 2 (2.8)              | 0.40          |
| 12             | 0.56                        | 145 (15.6)        | 5 (3.5)                         | 0.32                   | 2 (1.4)           | 0.25          | 1 (0.7)              | 0.10          |
| 22             | 1.27                        | 25 (2.7)          | 1 (4.0)                         | 0.37                   | 1 (4.0)           | 0.71          | -                    | -             |
| 28             | 1.50                        | 51 (5.5)          | 5 (9.8)                         | 0.91                   | -                 | -             | 5 (9.8)              | 1.40          |
| 87             | 1.39                        | 30 (3.2)          | 2 (6.7)                         | 0.62                   | 2 (6.7)           | 1.19          | 1 (3.3)              | 0.48          |
| 89             | 0.78                        | 136 (14.6)        | 2 (1.5)                         | 0.14                   | 1 (0.7)           | 0.13          | 2 (1.5)              | 0.21          |
| <b>Overall</b> | <b>0.96</b>                 | <b>830 (89.3)</b> | <b>23 (2.8)</b>                 | <b>0.26</b>            | <b>9 (1.1)</b>    | <b>0.19</b>   | <b>17 (2.1)</b>      | <b>0.29</b>   |
| <b>High</b>    |                             |                   |                                 |                        |                   |               |                      |               |
| 11             | 4.92                        | 11 (1.2)          | 9 (81.8)                        | 7.60                   | 9 (81.8)          | 14.62         | 7 (63.6)             | 9.10          |
| 75             | 1.84                        | 17 (1.8)          | 11 (64.7)                       | 6.01                   | 2 (11.8)          | 2.10          | 9 (52.9)             | 7.57          |
| 77             | 1.64                        | 22 (2.4)          | 22 (100)                        | 9.29                   | 22 (100)          | 17.87         | 7 (31.8)             | 4.55          |
| 92             | NA <sup>d</sup>             | 11 (1.2)          | 11 (100)                        | 9.29                   | 11 (100)          | 17.87         | 11 (100)             | 14.29         |
| <b>Overall</b> | <b>2.70*</b>                | <b>61 (6.6)</b>   | <b>53 (86.8)</b>                | <b>8.07**</b>          | <b>44 (72.1)</b>  | <b>9.26**</b> | <b>30 (49.2)</b>     | <b>7.97**</b> |

68

69 <sup>a</sup> Invasive index (index) defined as the frequency of occurrence in invasive divided by the

70 frequency of occurrence in pharyngeal diseases for each *emm* type and collectively by group

71 (Overall).

72 <sup>b</sup> Percent resistance within the given *emm* type.

73 <sup>c</sup> Observed/Expected resistance (O/E) ratios defined in Methods.

74 <sup>d</sup> Invasive index not calculable for *emm92* as none identified in pharyngeal disease.

75 \* *P*=0.03 and \*\* *P*=0.003 (Mann-Whitney U test) compared to Low.

76

77 TABLE S5. Summary of completed genomes for *emm11*, *emm75*, *emm77*, and *em92* GAS  
 78 strains.

79

| Strain<br>(Accession<br>no.)       | <i>emm</i><br>type | Chromosome<br>(bp) | Plasmid<br>(bp) | Prophage <sup>a</sup> | Prophage-<br>associated<br>genes <sup>b</sup>                    | Other MGE <sup>c</sup>                                                |
|------------------------------------|--------------------|--------------------|-----------------|-----------------------|------------------------------------------------------------------|-----------------------------------------------------------------------|
| TSPY155<br>(CP032699)              | 11                 | 1882327            | -               | 3                     | <i>speH1</i> , <i>speC2</i> ,<br><i>sdn/mf</i>                   | Tn6002<br><i>tet(M)</i> , <i>erm(B)</i>                               |
| TSPY165<br>(CP033336)              | 77                 | 1812036            | -               | 1                     | <i>speM5</i> , <i>sla</i>                                        | Tn916<br><i>tet(M)</i>                                                |
| TSPY208<br>(CP033335)              | 75                 | 1801696            | -               | 4                     | <i>speK</i> , <i>speL1</i> ,<br><i>speC6</i> , <i>sdn/mf</i> (2) | Tn1207.1<br><i>mef(A)</i> , <i>msr(D)</i>                             |
| TSPY453<br>(CP033336)              | 77                 | 1976011            | -               | 3                     | <i>speK</i> , <i>sdn/mf</i> (3)                                  | ICESpyM77.2<br><i>tet(O)</i> , <i>erm(A)</i>                          |
| TSPY556<br>(CP032700;<br>CP032701) | 92                 | 1828132            | 4968            | 1                     | <i>speK</i> , <i>sdn/mf</i>                                      | ICESpyM92<br><i>tet(M)</i> , <i>aph(3')-III</i> ,<br><i>ant(6)-Ia</i> |

80

81 <sup>a</sup> Prophage identified using Phaster (11).

82 <sup>b</sup> GAS virulence factors residing within prophage.

83 <sup>c</sup> Mobile genetic elements (MGE) identified using ISFinder (12), IslandViewer (13), and ICEBerg

84 (14).

85

86 TABLE S6. Minimal inhibitory concentrations (MICs) to selected aminoglycosides for *emm11*  
 87 and *emm92* GAS strains from Houston.

88

| Strain                | <i>emm</i> Type | AG Resistance Gene(s)         | Kanamycin <sup>1</sup> | Streptomycin | Gentamicin |
|-----------------------|-----------------|-------------------------------|------------------------|--------------|------------|
| TSPY556               | 92              | <i>ant(6)-Ia, aph(3')-III</i> | >2000                  | >2000        | 1.5        |
| TSPY783               | 92              | <i>ant(6)-Ia, aph(3')-III</i> | >2000                  | >2000        | 2.0        |
| TSPY854               | 92              | <i>ant(6)-Ia, aph(3')-III</i> | 2000                   | >2000        | 2.0        |
| TSPY1042              | 92              | <i>ant(6)-Ia, aph(3')-III</i> | >2000                  | >2000        | 1.5        |
| TSPY1076              | 92              | <i>ant(6)-Ia, aph(3')-III</i> | 1000                   | 1000         | 1.5        |
| TSPY1089              | 92              | <i>ant(6)-Ia, aph(3')-III</i> | >2000                  | >2000        | 2.0        |
| TSPY1195              | 92              | <i>ant(6)-Ia, aph(3')-III</i> | 2000                   | 2000         | 3.0        |
| TSPY1218              | 92              | <i>ant(6)-Ia, aph(3')-III</i> | >2000                  | >2000        | 1.5        |
| TSPY1227              | 92              | <i>ant(6)-Ia, aph(3')-III</i> | 2000                   | 2000         | 1.5        |
| TSPY1285              | 92              | <i>ant(6)-Ia, aph(3')-III</i> | >2000                  | >2000        | 1.5        |
| TSPY1287              | 92              | <i>ant(6)-Ia, aph(3')-III</i> | >2000                  | >2000        | 0.75       |
| TSPY155               | 11              |                               | 62.5                   | 15.6         | 2.0        |
| TSPY376               | 11              |                               | 62.5                   | 15.6         | 1.5        |
| TSPY555               | 11              |                               | 62.5                   | 15.6         | 2.0        |
| TSPY682               | 11              |                               | 62.5                   | 15.6         | 1.5        |
| TSPY711               | 11              | <i>aph(3')-III</i>            | >2000                  | 15.6         | 3.0        |
| TSPY784               | 11              |                               | 62.5                   | 31.3         | 1.5        |
| TSPY942               | 11              |                               | 62.5                   | 15.6         | 2.0        |
| TSPY1115 <sup>2</sup> | 11              | <i>aph(3')-III</i>            | -                      | -            | 1.0        |
| TSPY1165              | 11              | <i>aph(3')-III</i>            | >2000                  | 15.6         | 2.0        |
| TSPY1172              | 11              |                               | 62.5                   | 15.6         | 1.5        |
| TSPY1239              | 11              |                               | 62.5                   | 15.6         | 3.0        |

89

90 Abbreviations: aminoglycoside (AG)

91 <sup>1</sup> Values represent MICs (ug/mL). MICs to kanamycin and streptomycin determined by broth  
 92 microdilution and to gentamicin determined using Etest as described in Methods.

93 <sup>2</sup> TSPY1115 growth defective in liquid medium.

94 TABLE S7. Minimal inhibitory concentrations (MICs) to erythromycin and clindamycin for a  
95 subset of *emm77* GAS from Houston.

96

| Strain  | <i>emm</i><br>Type | Resistance<br>Gene(s)                      | Erythromycin <sup>1</sup> | Clindamycin |
|---------|--------------------|--------------------------------------------|---------------------------|-------------|
| TSPY165 | 77                 | <i>tet(M)</i>                              | 0.016                     | 0.032       |
| TSPY311 | 77                 | <i>erm(A), tet(O)</i>                      | 0.5                       | 0.047       |
| TSPY377 | 77                 | <i>erm(A), tet(O)</i>                      | 1.0                       | 0.047       |
| TSPY453 | 77                 | <i>erm(A)</i> <sup>2</sup> , <i>tet(O)</i> | 2.0                       | >256        |
| TSPY477 | 77                 | <i>tet(O)</i>                              | 0.023                     | 0.064       |

97

98 <sup>1</sup> Values represent MICs (ug/mL) determined using Etest as described in Methods.

99 <sup>2</sup> Upstream regulatory region of TSPY453 *erm(A)* contains two point mutations as described in  
100 text and Figure S4.

101

102 SUPPORTING FIGURES  
 103

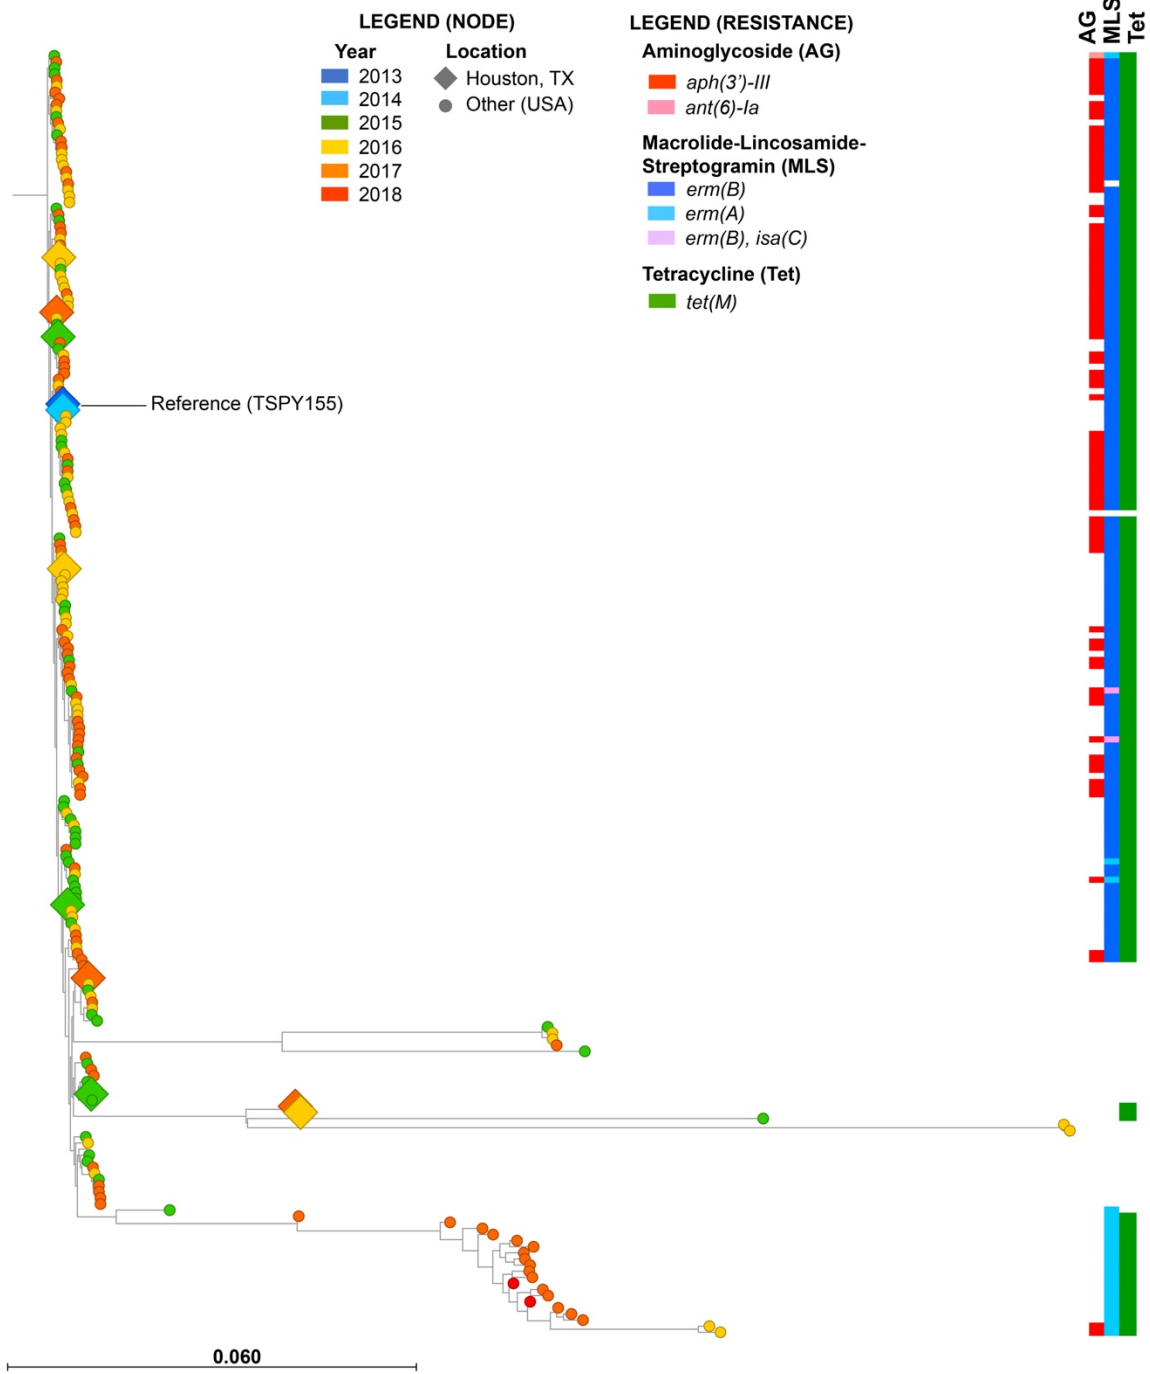

104  
 105

106

107 FIGURE S1. Phylogenetic reconstruction using 11,540 core biallelic SNP loci of *emm11* GAS

108 from the Houston (n=10) and CDC ABCs (n=199) relative to the reference TSPY155. Node

109 color and shape indicate year of isolation and geographic location, respectively (node legend).  
110 Resistance genotype for aminoglycosides (AG), macrolide-lincosamide-streptogramin (MLS),  
111 and tetracycline (Tet) shown on right and colored by allele (resistance legend).  
112

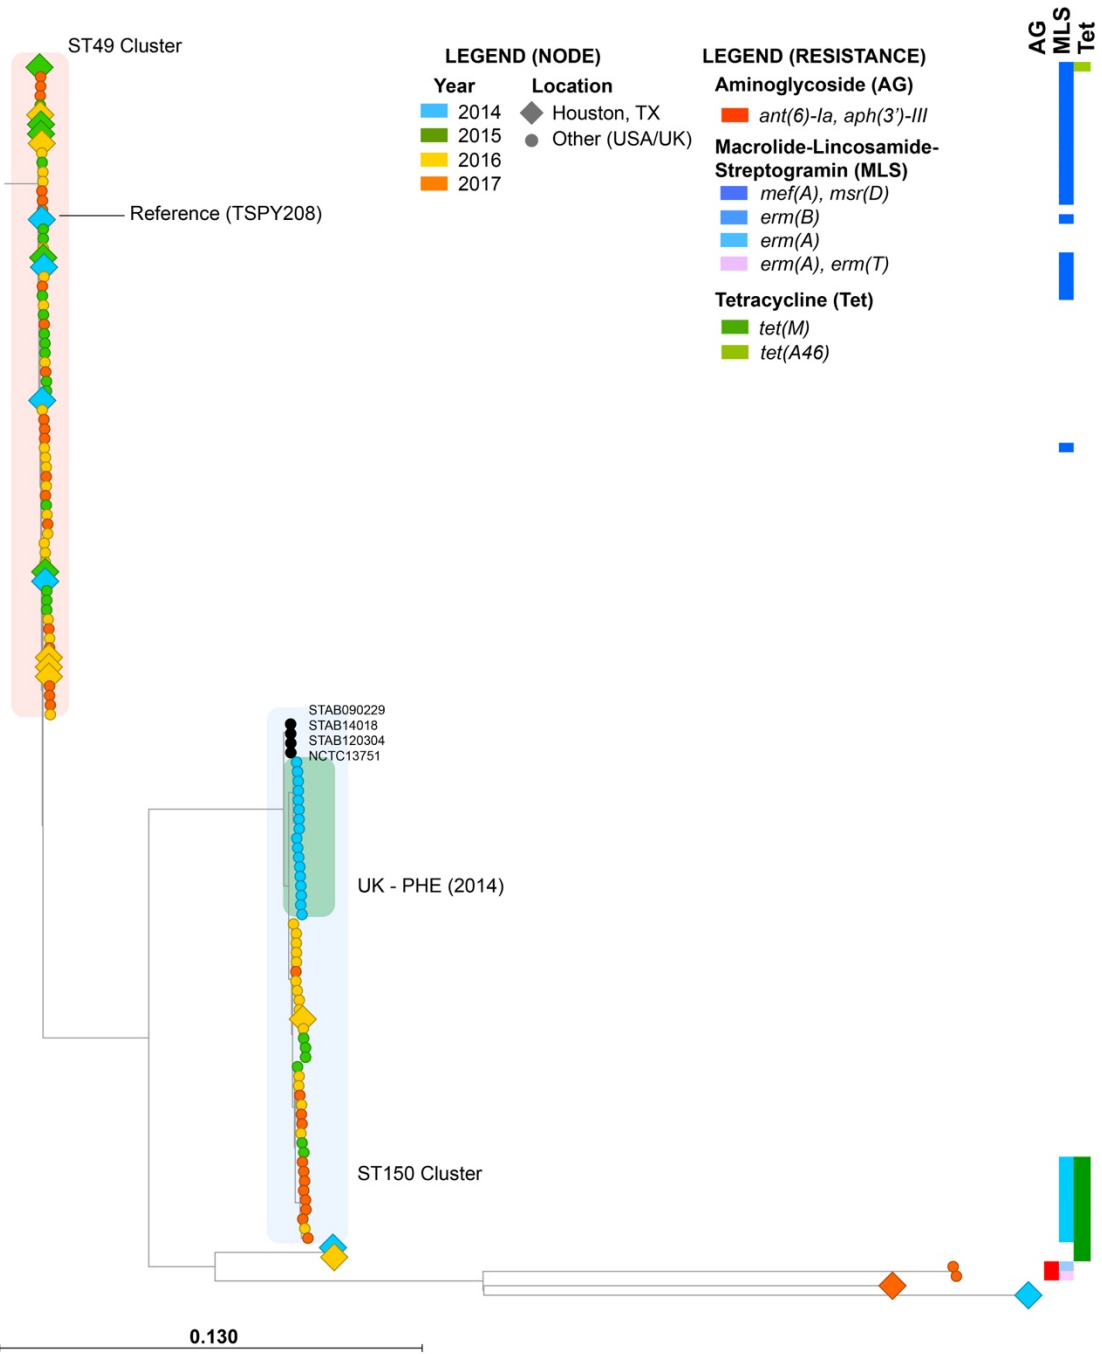

114  
115

116

117 FIGURE S2. Phylogenetic reconstruction using 12,568 core biallelic SNP loci of *emm75* GAS  
 118 strains from the Houston (n=16), CDC ABCs (n=88) and the UK (n=17) relative to the reference  
 119 TSPY208. Completed reference genomes NCTC13751, STAB14018, STAB090229, and



120 STAB120304 are labeled. The two distinct multi-locus sequence type (MLST) clusters, ST49  
121 and ST150, are shaded in red and blue, respectively. The *emm75* strains from the UK are  
122 shaded in green. Nodes and resistance genotype are depicted as in Figure S1.  
123

124 FIGURE S3.  
 125

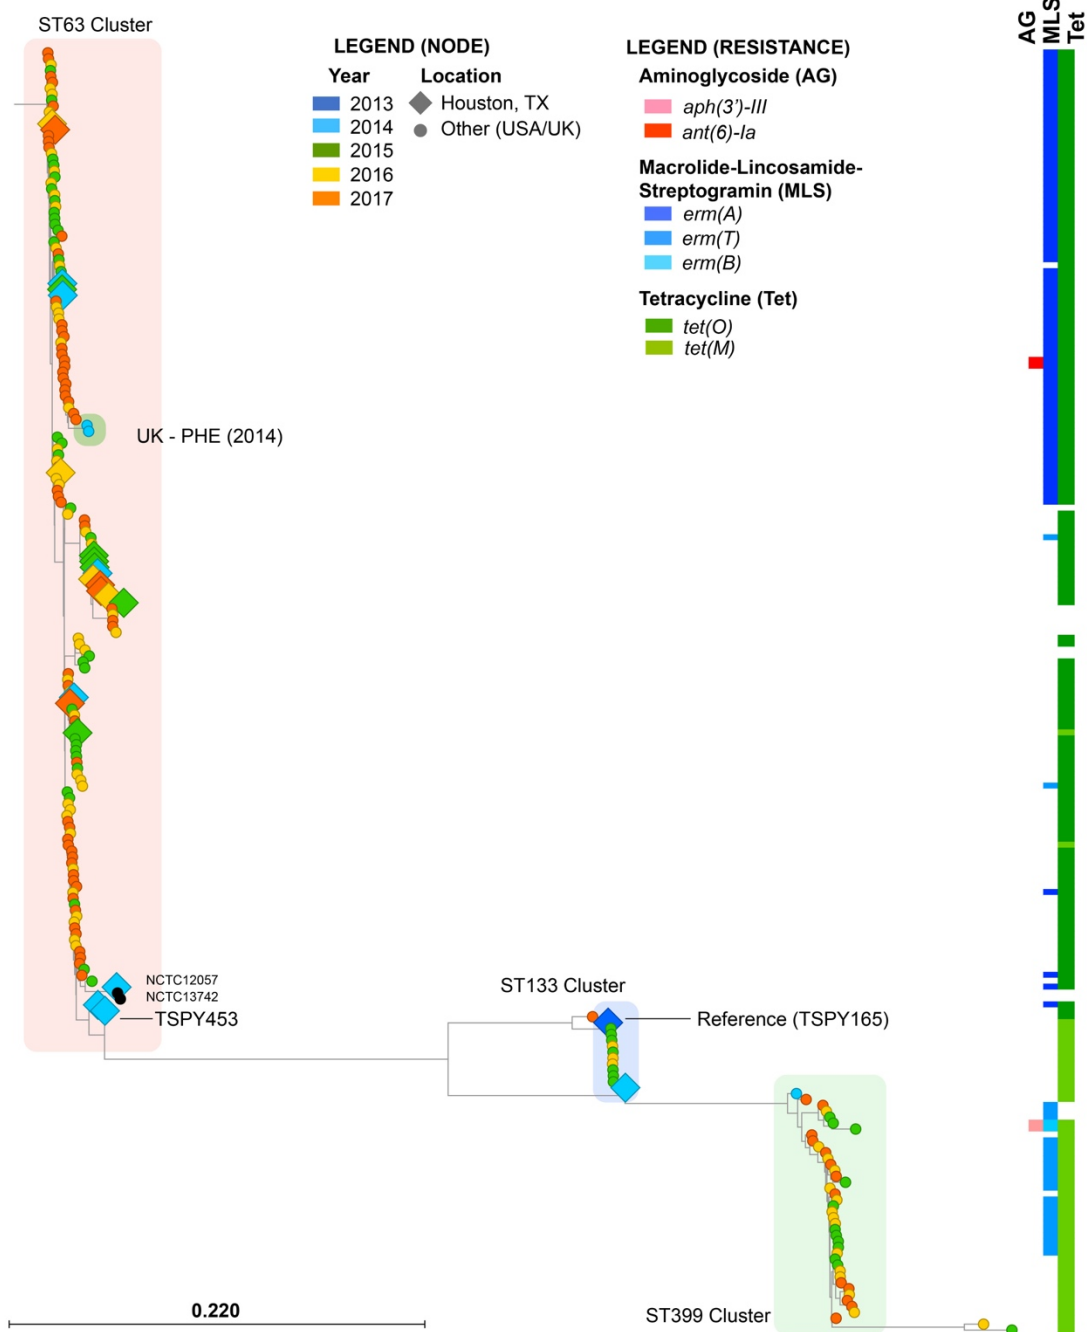

126  
 127

128

129 FIGURE S3. Phylogenetic reconstruction using 35,685 core biallelic SNP loci of *emm77* GAS  
 130 strains from the Houston (n=21), CDC ABCs (n=189) and UK (n=3) relative to the reference

131 TSPY165. Completed reference genomes NCTC12057, NCGTC13742, and TSPY453 are  
132 labeled. Three distinct multi-locus sequence type (MLST) clusters are shaded and labeled. The  
133 *emm77* strains from the UK are shaded in green. Nodes and resistance genotypes are depicted  
134 as in Figure S1.

135

136

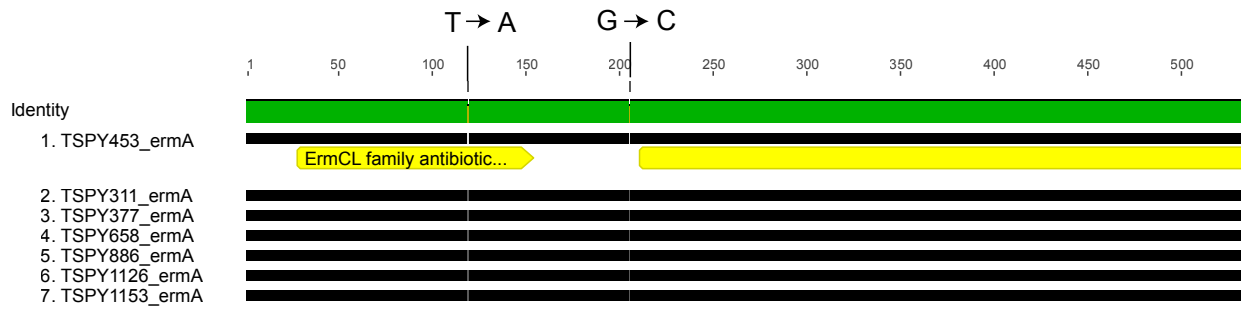

139 FIGURE S4. Nucleotide alignment of *erm(A)* upstream sequences in *emm77* GAS strains from

140 Houston. Shown are sequences of strains subjected to MIC determinations in Table S6.

141 Nucleotide changes in TSPY453 are indicated above the alignment. Yellow bars indicate the

142 upstream leader peptide and coding sequence of *erm(A)* in TSPY453.

143

144 **REFERENCES**

- 145
- 146 1. **Koren, S., B. P. Walenz, K. Berlin, J. R. Miller, N. H. Bergman, and A. M. Phillippy.**
- 147 2017. Canu: scalable and accurate long-read assembly via adaptive k-mer weighting
- 148 and repeat separation. *Genome Res.* **27**:722-736.
- 149 2. **Wick, R. R., L. M. Judd, C. L. Gorrie, and K. E. Holt.** 2017. Unicycler: Resolving
- 150 bacterial genome assemblies from short and long sequencing reads. *PLoS Comput Biol.*
- 151 **13**:e1005595.
- 152 3. **Chochua, S., B. J. Metcalf, Z. Li, J. Rivers, S. Mathis, D. Jackson, R. E. Gertz, Jr., V.**
- 153 **Srinivasan, R. Lynfield, C. Van Beneden, L. McGee, and B. Beall.** 2017. Population
- 154 and Whole Genome Sequence Based Characterization of Invasive Group A Streptococci
- 155 Recovered in the United States during 2015. *MBio.* **8**.
- 156 4. **Chalker, V., A. Jironkin, J. Coelho, A. Al-Shahib, S. Platt, G. Kapatai, R. Daniel, C.**
- 157 **Dhami, M. Laranjeira, T. Chambers, R. Guy, T. Lamagni, T. Harrison, M. Chand, A.**
- 158 **P. Johnson, A. Underwood, and T. Scarlet Fever Incident Management.** 2017.
- 159 Genome analysis following a national increase in Scarlet Fever in England 2014. *BMC*
- 160 *Genomics.* **18**:224.
- 161 5. **Bolger, A. M., M. Lohse, and B. Usadel.** 2014. Trimmomatic: a flexible trimmer for
- 162 Illumina sequence data. *Bioinformatics.* **30**:2114-20.
- 163 6. **Liu, Y., J. Schroder, and B. Schmidt.** 2013. Musket: a multistage k-mer spectrum-
- 164 based error corrector for Illumina sequence data. *Bioinformatics.* **29**:308-15.
- 165 7. **Garrison, E., and G. Marth.** 2012. Haplotype-based variant detection from short-read
- 166 sequencing. *arXiv preprint.*
- 167 8. **Price, M. N., P. S. Dehal, and A. P. Arkin.** 2010. FastTree 2--approximately maximum-
- 168 likelihood trees for large alignments. *PLoS One.* **5**:e9490.
- 169 9. **Bankevich, A., S. Nurk, D. Antipov, A. A. Gurevich, M. Dvorkin, A. S. Kulikov, V. M.**
- 170 **Lesin, S. I. Nikolenko, S. Pham, A. D. Prjibelski, A. V. Pyshkin, A. V. Sirotkin, N.**

- 171 **Vyahhi, G. Tesler, M. A. Alekseyev, and P. A. Pevzner.** 2012. SPAdes: a new genome  
172 assembly algorithm and its applications to single-cell sequencing. *J Comput Biol.*  
173 **19:455-77.**
- 174 10. **Sullivan, M. J., N. K. Petty, and S. A. Beatson.** 2011. Easyfig: a genome comparison  
175 visualizer. *Bioinformatics.* **27:1009-10.**
- 176 11. **Arndt, D., J. R. Grant, A. Marcu, T. Sajed, A. Pon, Y. Liang, and D. S. Wishart.** 2016.  
177 PHASTER: a better, faster version of the PHAST phage search tool. *Nucleic Acids Res.*  
178 **44:W16-21.**
- 179 12. **Siguiier, P., J. Perochon, L. Lestrade, J. Mahillon, and M. Chandler.** 2006. ISfinder:  
180 the reference centre for bacterial insertion sequences. *Nucleic Acids Res.* **34:D32-6.**
- 181 13. **Bertelli, C., M. R. Laird, K. P. Williams, G. Simon Fraser University Research**  
182 **Computing, B. Y. Lau, G. Hoad, G. L. Winsor, and F. S. L. Brinkman.** 2017.  
183 IslandViewer 4: expanded prediction of genomic islands for larger-scale datasets.  
184 *Nucleic Acids Res.* **45:W30-W35.**
- 185 14. **Liu, M., X. Li, Y. Xie, D. Bi, J. Sun, J. Li, C. Tai, Z. Deng, and H. Y. Ou.** 2019. ICEberg  
186 2.0: an updated database of bacterial integrative and conjugative elements. *Nucleic*  
187 *Acids Res.* **47:D660-D665.**

188
